# Supplementary material for: Applicability of Scrape Loading-Dye Transfer Assay for Non-Genotoxic Carcinogen Testing
Source: MDPI journal article supplement (doi:10.3390/ijms22168977), 2021-08-20
Supplement: s1 [file s1]

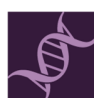

Review

# Applicability of Scrape Loading-Dye Transfer Assay for Non-Genotoxic Carcinogen Testing

Iva Sovadinová <sup>1</sup>, Brad L. Upham <sup>2</sup>, James E. Trosko <sup>2</sup> and Pavel Babica <sup>1,\*</sup>

<sup>1</sup> RECETOX, Faculty of Science, Masaryk University, 625-00 Brno, Czech Republic;

[iva.sovadinova@recetox.muni.cz](mailto:iva.sovadinova@recetox.muni.cz)

<sup>2</sup> Department of Pediatrics and Human Development, Institute for Integrative Toxicology, Michigan State University, East Lansing, MI 48824, USA; [upham@msu.edu](mailto:upham@msu.edu) (B.L.U.); [trosko@msu.edu](mailto:trosko@msu.edu) (J.E.T.)

\* Correspondence: [pavel.babica@recetox.muni.cz](mailto:pavel.babica@recetox.muni.cz); Tel.: +420-549-494-620

## Content

| Supplementary Texts     | Pages   |
|-------------------------|---------|
| Supplementary Text S1   | S2-S4   |
| Supplementary Tables    |         |
| Supplementary Table S1  | S5-S25  |
| Supplementary Figures   |         |
| Supplementary Figure S1 | S26     |
| References              | S27-S33 |



OR "P3"[Text Word]) OR "LMH"[Text Word]) OR "M.P3"[Text Word]) OR "NCTC clone"[Text Word]) OR "NOZ"[Text Word]) OR "OCUG-1"[Text Word]) OR "PLC/PRF/5"[Text Word]) OR "RI-T"[Text Word]) OR "RL-34"[Text Word]) OR "RLC"[Text Word]) OR "RLN"[Text Word]) OR "TLR"[Text Word]) OR "T51B"[Text Word]) OR "rel cell"[Text Word]) OR "IAR20"[Text Word]) OR "IAR 20"[Text Word]) OR "IAR203"[Text Word]) OR "IAR27E"[Text Word]) OR "IAR6-1"[Text Word]) OR "IAR27F"[Text Word]) OR "IAR"[Text Word]) OR "Clone 9"[Text Word]) OR "RLEC"[Text Word]) OR "H4IIE"[Text Word]) OR "MH1C1"[Text Word]) OR "MIHA"[Text Word]) OR "HepaRG"[Text Word])

## B. Literature strategy in SCOPUS through October 30, 2020

TOPIC: ("primary liver cell\*" OR "liver" OR "hepatic" OR "oval cell\*" OR "hepatic cell\*" OR "sinusoidal endothelial cell\*" OR "Kupffer cell\*" OR "stellate cell\*" OR "liver endothelial cell\*" OR "liver epithelial cell line" OR "liver slice" OR "parenchymal cell\*" OR "nonparenchymal cell\*" OR "non-parenchymal cell\*" OR "liver cell\*" OR "hepatocyte\*" OR "Ito cell\*" OR "ARL 18" OR "ARL18" OR "Ac2F" OR "AH601" OR "AH66tc" OR "AH70Btc" OR "AH-7974.P3" OR "Alexander cell\*" OR "ARLJ301-3" OR "AML12" OR "FAH cell\*" OR "CFH cell\*" OR "Hep3B" OR "F344" OR "WB-F344" OR "WB F344" OR "WBF344" OR "WB cell\*" OR "WB-a/32-10" OR "WB-aB1" OR "WBHa-ras" OR "Chang liver" OR "MTR6" OR "T51B" OR "BRL" OR "BRL-3A" OR "mRLh" OR "dRLa-74" OR "dRLh" OR "dRLN" OR "FLS" OR "Hep G2" OR "HepG2" OR "Huh7" OR "Huh" OR "Huh-7" OR "HLE" OR "HLF" OR "HuCCT1" OR "JHH" OR "JTC-16" OR "P3" OR "LMH" OR "M.P3" OR "NCTC clone" OR "NOZ" OR "OCUG-1" OR "PLC/PRF/5" OR "RI-T" OR "RL-34" OR "RLC" OR "RLN" OR "TLR" OR "T51B" OR "REL cell\*" OR "IAR20" OR "IAR 20" OR "IAR203" OR "IAR 203" OR "IAR27E" OR "IAR 27E" OR "IAR6-1" OR "IAR27F" OR "IAR" OR "Clone 9" OR "RLEC" OR "H4IIE" OR "MH1C1" OR "MIHA" OR "HepaRG") AND TOPIC: ("Chemicals and Drugs Category" OR "Xenobiotics" OR "Inorganic Chemicals" OR "Organic Chemicals" OR "Pharmaceutical Preparations"[Mesh] OR "Polycyclic Compounds" OR "Heterocyclic Compounds" OR "Pesticides" OR "Toxins" OR "Toxin" OR "Cyanotoxin" OR "Cyanotoxins" OR "Agent\*" OR "Anthracene\*" OR "Aromatic Polycyclic Hydrocarbon\*" OR "Bisphenol\*" OR "BPA" OR "BPF" OR "BPS" OR "Brominated Flame Retardant\*" OR "Cadmium" OR "Carbon" OR "Carbon Tetrachloride" OR "Carcinogen\*" OR "Chemical\*" OR "Chlorpyrifos" OR "Compound\*" OR "Contaminant\*" OR "DBP" OR "DDE" OR "DDT" OR "DEHP" OR "Dibutyl phthalate" OR "Dieldrin" OR "Diethylhexyl" OR "Diethylhexyl phthalate" OR "DINCH" OR "Dioxin\*" OR "Drug\*" OR "Fluorene\*" OR "Furan" OR "Metal\*" OR "Naphthalene\*" OR "Organophosphate\*" OR "Paraben" OR "PCB" OR "PCBs" OR "Perchlorate" OR "Perfluorinated chemical\*" OR "Pesticide\*" OR "Herbicide\*" OR "Insecticide\*" OR "PFOA" OR "PFOS" OR "Phenol" OR "Phthalate\*" OR "Phytoestrogen\*" OR "Personal care product" OR "Personal care products" OR "Pollutant\*" OR "Polychlorinated Biphenyl\*" OR "Polychlorinated dibenzodioxin\*" OR "Polycyclic Aromatic Hydrocarbon\*" OR "Polynuclear Aromatic Hydrocarbon\*" OR "Pyrene\*" OR "TCDD" OR "Tetrachloride" OR "Tetrachloromethane" OR "Tetracycline" OR "Thioacetamide" OR "Toxicant\*" OR "Tributyltin" OR "Triclosan" OR "Tumor promotor\*" OR "Volatile Organic Compound\*" OR "Xenobiotic\*" OR "Heterocyclic Compounds" OR "Inorganic Chemicals" OR "Organic Chemicals" OR "Pesticides" OR "Pharmaceutical Preparations" OR "Polycyclic Compounds" OR "Biological Toxins" OR "Ionizing Radiation" OR "Ionizing Radiations") AND TOPIC: ("Cell Junction" OR "Cell Junctions" OR "Gap Junction Channel Proteins" OR "Gap Junction Protein" OR "Gap Junction Proteins" OR "Gap Junction" OR "Gap junctional intercellular communication" OR "Gap junctional intercellular communications" OR "Gap Junctions" OR "Gap Junctions" OR "GJIC")

Timespan: All years. Indexes: SCI-EXPANDED, SSCI, A&HCI, CPCI-S, CPCI-SSH, BKCI-S, BKCI-SSH, ESCI, CCR-EXPANDED, IC.

## C. Literature strategy in Web of Science through October 30, 2020

TITLE-ABS-KEY ( "primary liver cell\*" OR "liver" OR "hepatic" OR "oval cell\*" OR "hepatic cell\*" OR "sinusoidal endothelial cell\*" OR "Kupffer cell\*" OR "stellate cell\*" OR "liver endothelial cell\*" OR "liver epithelial cell line" OR "liver slice" OR "parenchymal cell\*" OR "nonparenchymal cell\*" OR "non-parenchymal cell\*" OR "liver cell\*" OR "hepatocyte\*" OR "Ito cell\*" OR "ARL 18" OR "ARL18" OR "Ac2F" OR "AH601" OR "AH66tc" OR "AH70Btc" OR "AH-7974.P3" OR "Alexander cell\*" OR "ARLJ301-3" OR "AML12" OR "FAH cell\*" OR "CFH cell\*" OR "Hep3B" OR "F344" OR "WB-F344" OR "WB F344" OR "WBF344" OR "WB cell\*" OR "WB-a/32-10" OR "WB-aB1" OR "WBHa-ras" OR "Chang liver" OR "MTR6" OR "T51B" OR "BRL" OR "BRL-3A" OR "mRLh" OR "dRLa-74" OR "dRLh" OR

"dRLN" OR "FLS" OR "Hep G2" OR "HepG2" OR "Huh7" OR "Huh" OR "Huh-7" OR "HLE" OR "HLF" OR "HuCCT1" OR "JHH" OR "JTC-16" OR "P3" OR "LMH" OR "M.P3" OR "NCTC clone" OR "NOZ" OR "OCUG-1" OR "PLC/PRF/5" OR "RI-T" OR "RL-34" OR "RLC" OR "RLN" OR "TLR" OR "T51B" OR "REL cell\*" OR "IAR20" OR "IAR 20" OR "IAR203" OR "IAR 203" OR "IAR27E" OR "IAR 27E" OR "IAR6-1" OR "IAR27F" OR "IAR" OR "Clone 9" OR "RLEC" OR "H4IIE" OR "MH1C1" OR "MIHA" OR "HepaRG" ) AND TITLE-ABS-KEY ( "Chemicals and Drugs Category" OR "Xenobiotics" OR "Inorganic Chemicals" OR "Organic Chemicals" OR "Pharmaceutical Preparations" OR "Polycyclic Compounds" OR "Heterocyclic Compounds" OR "Pesticides" OR "Toxins" OR "Toxin" OR "Cyanotoxin" OR "Cyanotoxins" OR "Agent\*" OR "Anthracene\*" OR "Aromatic Polycyclic Hydrocarbon\*" OR "Bisphenol\*" OR "BPA" OR "BPF" OR "BPS" OR "Brominated Flame Retardant\*" OR "Cadmium" OR "Carbon" OR "Carbon Tetrachloride" OR "Carcinogen\*" OR "Chemical\*" OR "Chlorpyrifos" OR "Compound\*" OR "Contaminant\*" OR "DBP" OR "DDE" OR "DDT" OR "DEHP" OR "Dibutyl phthalate" OR "Dieldrin" OR "Diethylhexyl" OR "Diethylhexyl phthalate" OR "DINCH" OR "Dioxin\*" OR "Drug\*" OR "Fluorene\*" OR "Furan" OR "Metal\*" OR "Naphthalene\*" OR "Organophosphate\*" OR "Paraben" OR "PCB" OR "PCBs" OR "Perchlorate" OR "Perfluorinated chemical\*" OR "Pesticide\*" OR "Herbicide\*" OR "Insecticide\*" OR "PFOA" OR "PFOS" OR "Phenol" OR "Phthalate\*" OR "Phytoestrogen\*" OR "Personal care product" OR "Personal care products" OR "Pollutant\*" OR "Polychlorinated Biphenyl\*" OR "Polychlorinated dibenzodioxin\*" OR "Polycyclic Aromatic Hydrocarbon\*" OR "Polynuclear Aromatic Hydrocarbon\*" OR "Pyrene\*" OR "TCDD" OR "Tetrachloride" OR "Tetrachloromethane" OR "Tetracycline" OR "Thioacetamide" OR "Toxicant\*" OR "Tributyltin" OR "Triclosan" OR "Tumor promotor\*" OR "Volatile Organic Compound\*" OR "Xenobiotic\*" OR "Heterocyclic Compounds" OR "Inorganic Chemicals" OR "Organic Chemicals" OR "Pesticides" OR "Pharmaceutical Preparations" OR "Polycyclic Compounds" OR "Biological Toxins" OR "Ionizing Radiation" OR "Ionizing Radiations" ) AND TITLE-ABS-KEY ( "Cell Junction" OR "Cell Junctions" OR "Gap Junction Channel Proteins" OR "Gap Junction Protein" OR "Gap Junction Proteins" OR "Gap Junction" OR "Gap junctional intercellular communication" OR "Gap junctional intercellular communications" OR "Gap Junctions" OR "Gap Junctions" OR "GJIC" )

## Tables

Table S1 Results of 328 chemicals assessed using SL-DT assay in WB-F344 cells

| No. | Chemical group<br>Chemical                      | CASRN      | GJIC        |                          |                           |         | MC assay<br>[1,2] | Genotoxicity             |                          |             | Carcinogenicity          |             |                               |
|-----|-------------------------------------------------|------------|-------------|--------------------------|---------------------------|---------|-------------------|--------------------------|--------------------------|-------------|--------------------------|-------------|-------------------------------|
|     |                                                 |            | SL-DT assay |                          |                           | Ref.    |                   | Ames<br>Overall<br>[3,4] | Other<br>assays<br>[3,4] | Over<br>all | OncoLogic<br>9.0/8.0 [6] | IARC<br>[7] | CompTox/<br>ToxRefDB<br>[5,8] |
|     |                                                 |            | — ↓         | EC <sub>50</sub><br>(μM) | ET <sub>50</sub><br>(min) |         |                   |                          |                          |             |                          |             |                               |
| 1   | <b>Aldehydes</b><br>Formaldehyde                | 50-00-0    | —           | >100<br>(0.5 h)          | <i>n.d.</i>               | [9]     | —                 | +                        | +                        | +           | High-<br>moderate        | Group<br>1  | +                             |
| 2   | <b>Anilides</b><br>Vinclozolin M2               | 83792-61-4 | ↓           | 250<br>(2 h)             | 120<br>(250 μM)           | [10]    |                   |                          |                          |             |                          |             | N.A.                          |
| 3   | <b>Aromatic amine derivatives</b><br>N-OH-MBOCA |            | —           | >4<br>(0.5 h)            | <i>n.d.</i>               | [11]    |                   |                          |                          |             |                          |             |                               |
| 4   | NO-MBOCA                                        |            | —           | >72<br>(0.5 h)           | <i>n.d.</i>               | [11]    |                   |                          |                          |             |                          |             |                               |
| 5   | o-OH-MBOCA                                      |            | —           | >180<br>(0.5 h)          | <i>n.d.</i>               | [11]    |                   |                          |                          |             |                          |             |                               |
| 6   | <b>Benzopyrans</b><br>Epigallocatechin gallate  | 989-51-5   | ↓           | 150<br>(1 h)             | 150<br>(200 μM)           | [12]    |                   |                          |                          |             |                          |             | N.A.                          |
| 7   | <b>Cannabinoids</b><br>Cannabinol               | 521-35-7   | ↓           | 13<br>(0.5 h)            | 10<br>(20 μM)             | [13]    |                   |                          |                          |             |                          |             | N.A.                          |
| 8   | THC                                             | 1972-08-3  | ↓           | 13<br>(0.5 h)            | 10<br>(20 μM)             | [13]    |                   |                          |                          |             |                          |             | +                             |
| 9   | <b>Carbamates</b><br>Carbofuran                 | 1563-66-2  | —           | >452<br>(1 h)            | <i>n.d.</i>               | [14]    |                   |                          |                          |             | Uncertain/<br>Unknown    |             | +                             |
| 10  | <b>Catechins</b><br>Epicatechin                 | 490-46-0   | —           | >96<br>(1, 24 h)         | <i>n.d.</i>               | [12,15] |                   |                          |                          |             |                          |             | N.A.                          |
|     | <b>Chalcone derivatives</b>                     |            |             |                          |                           |         |                   |                          |                          |             |                          |             |                               |

|    |                                          |            |   |                 |             |      |  |  |  |  |      |
|----|------------------------------------------|------------|---|-----------------|-------------|------|--|--|--|--|------|
| 11 | 2',3',3-Trihydroxychalcone               |            | ↓ | 181<br>(0.5 h)  | <i>n.d.</i> | [26] |  |  |  |  |      |
| 12 | 2',3-Dihydroxychalcone                   |            | ↓ | 9<br>(0.5 h)    | <i>n.d.</i> | [26] |  |  |  |  |      |
| 13 | 2',3-Dihydroxydihydrochalcone            |            | ↓ | 74<br>(0.5 h)   | <i>n.d.</i> | [26] |  |  |  |  |      |
| 14 | 2,4,4'-Trihydroxychalcone                | 83616-07-3 | — | >200<br>(0.5 h) | <i>n.d.</i> | [26] |  |  |  |  | N.A. |
| 15 | 2',4',4-Trihydroxychalcone               |            | — | >200<br>(0.5 h) | <i>n.d.</i> | [26] |  |  |  |  |      |
| 16 | 2',4',4-Trihydroxydihydrochalcone        |            | — | >200<br>(0.5 h) | <i>n.d.</i> | [26] |  |  |  |  |      |
| 17 | 2',4'-Dihydroxy-3-methoxychalcone        |            | — | >200<br>(0.5 h) | <i>n.d.</i> | [26] |  |  |  |  |      |
| 18 | 2',4-Dihydroxy-3-methoxychalcone         |            | ↓ | 140<br>(0.5 h)  | <i>n.d.</i> | [26] |  |  |  |  |      |
| 19 | 2',4'-Dihydroxy-3-methoxydihydrochalcone |            | — | >200<br>(0.5 h) | <i>n.d.</i> | [26] |  |  |  |  |      |
| 20 | 2',4-Dihydroxychalcone                   | 13323-66-5 | ↓ | 49<br>(0.5 h)   | <i>n.d.</i> | [26] |  |  |  |  | N.A. |
| 21 | 2',4-Dihydroxydihydrochalcone            |            | — | >200<br>(0.5 h) | <i>n.d.</i> | [26] |  |  |  |  |      |
| 22 | 2'-Hydroxy-2,4-dimethoxychalcone         |            | ↓ | 33<br>(0.5 h)   | <i>n.d.</i> | [26] |  |  |  |  |      |
| 23 | 2'-Hydroxy-2,4-dimethoxydihydrochalcone  |            | ↓ | 40<br>(0.5 h)   | <i>n.d.</i> | [26] |  |  |  |  |      |
| 24 | 2'-Hydroxy-3,4-dimethoxychalcone         |            | ↓ | 76<br>(0.5 h)   | <i>n.d.</i> | [26] |  |  |  |  |      |
| 25 | 2'-Hydroxy-3,4-dimethoxydihydrochalcone  |            | — | >200<br>(0.5 h) | <i>n.d.</i> | [26] |  |  |  |  |      |
| 26 | 2'-Hydroxy-3-methoxychalcone             |            | ↓ | 34<br>(0.5 h)   | <i>n.d.</i> | [26] |  |  |  |  |      |
| 27 | 2'-Hydroxy-3-methoxydihydrochalcone      |            | ↓ | 60<br>(0.5 h)   | <i>n.d.</i> | [26] |  |  |  |  |      |
| 28 | 2'-Hydroxy-4-methoxychalcone             | 3327-24-0  | ↓ | 83<br>(0.5 h)   | <i>n.d.</i> | [26] |  |  |  |  |      |
| 29 | 2'-Hydroxy-4-methoxydihydrochalcone      |            | ↓ | 50<br>(0.5 h)   | <i>n.d.</i> | [26] |  |  |  |  |      |
| 30 | 2'-Hydroxychalcone                       | 888-12-0   | ↓ | 8<br>(0.5 h)    | <i>n.d.</i> | [26] |  |  |  |  |      |

|                                   |                                                      |            |   |                                      |               |         |   |   |   |   |                          |          |
|-----------------------------------|------------------------------------------------------|------------|---|--------------------------------------|---------------|---------|---|---|---|---|--------------------------|----------|
| 31                                | 2-Hydroxychalcone                                    | 644-78-0   | ↓ | 9<br>(0.5 h)                         | <i>n.d.</i>   | [26]    |   |   |   |   | Low-moderate to Moderate | N.A.     |
| 32                                | 2'-Hydroxydihydrochalcone                            |            | ↓ | 13<br>(0.5 h)                        | <i>n.d.</i>   | [26]    |   |   |   |   |                          |          |
| 33                                | 2-Hydroxydihydrochalcone                             |            | ↓ | >200<br>(0.5 h)                      | <i>n.d.</i>   | [26]    |   |   |   |   |                          |          |
| 34                                | 4'-Hydroxy-2,4-dimethoxychalcone                     |            | ↓ | 190<br>(0.5 h)                       | <i>n.d.</i>   | [26]    |   |   |   |   |                          |          |
| 35                                | 4'-Hydroxy-2,4-dimethoxydihydrochalcone              |            | ↓ | >200<br>(0.5 h)                      | <i>n.d.</i>   | [26]    |   |   |   |   |                          |          |
| 36                                | 4'-Hydroxychalcone                                   | 2657-25-2  | — | >200<br>(0.5 h)                      | <i>n.d.</i>   | [26]    |   |   |   |   | Low-moderate to Moderate | N.A.     |
| 37                                | 4-Hydroxychalcone                                    | 20426-12-4 | — | >200<br>(0.5 h)                      | <i>n.d.</i>   | [26]    |   |   |   |   | Low-moderate to Moderate | N.A.     |
| 38                                | 4'-Hydroxydihydrochalcone                            |            | — | >200<br>(0.5 h)                      | <i>n.d.</i>   | [26]    |   |   |   |   |                          |          |
| 39                                | 4-Hydroxydihydrochalcone                             |            | ↓ | >200<br>(0.5 h)                      | <i>n.d.</i>   | [26]    |   |   |   |   |                          |          |
| <b>Chloroanilines</b>             |                                                      |            |   |                                      |               |         |   |   |   |   |                          |          |
| 40                                | MBOCA                                                | 101-14-4   | ↓ | 12<br>(0.5 h)                        | <i>n.d.</i>   | [11]    |   | + | + | + | Low to High-moderate     | Group 1  |
| <b>Chlorobenzilate metabolite</b> |                                                      |            |   |                                      |               |         |   |   |   |   |                          |          |
| 41                                | 4,4'-Dichlorobenzohydrol                             |            | — | >60<br>( <i>n.s.</i> )               | <i>n.d.</i>   | [23]    |   |   |   |   |                          |          |
| <b>Chlorohydroxyfuranones</b>     |                                                      |            |   |                                      |               |         |   |   |   |   |                          |          |
| 42                                | 3-Chloro-4-(dichloromethyl)-5-hydroxy-2(5H)-furanone | 77439-76-0 | ↓ | 8 or 18<br>(1, 2 h)<br>>18<br>(24 h) | 90<br>(18 µM) | [22,27] | ↓ | + | + | + | Low-moderate to Moderate | Group 2B |
| 43                                | 3,4-Dichloro-5-hydroxy-2(5H)-furanone                | 766-40-5   | ↓ | 40<br>(1, 12 h)                      | <i>n.d.</i>   | [22]    |   |   |   |   | Marginal to Low-moderate | N.A.     |
| <b>Coumarins</b>                  |                                                      |            |   |                                      |               |         |   |   |   |   |                          |          |

|                               |                                   |             |   |                          |              |         |   |  |  |              |      |
|-------------------------------|-----------------------------------|-------------|---|--------------------------|--------------|---------|---|--|--|--------------|------|
| 44                            | Dicumarol                         | 66-76-2     | ↓ | <100<br>(1 h)            | <i>n.d.</i>  | [16]    |   |  |  | Low-moderate | +    |
| 45                            | Warfarin                          | 81-81-2     | ↓ | 5000<br>(1 h)            | <i>n.d.</i>  | [16]    | ↓ |  |  | Moderate     | N.A. |
| <b>Diarylmethanes</b>         |                                   |             |   |                          |              |         |   |  |  |              |      |
| 46                            | Diacylglycerol kinase inhibitor I | 93076-89-2  | ↓ | <30<br>(0.2 h)           | <i>n.d.</i>  | [17]    |   |  |  |              | N.A. |
| <b>Ethylenediamines</b>       |                                   |             |   |                          |              |         |   |  |  |              |      |
| 47                            | BAPTA-AM                          | 126150-97-8 | ↓ | 3 to 20<br>(0.8 h)       | <i>n.d.</i>  | [18]    |   |  |  |              | N.A. |
| <b>Fatty acid derivatives</b> |                                   |             |   |                          |              |         |   |  |  |              |      |
| 48                            | Arachidonic acid, 15-Hydroperoxy  |             | ↓ | <20<br>(0.2 h)           | <i>n.d.</i>  | [19]    |   |  |  |              |      |
| 49                            | Arachidonic acid, 15-Hydroxy      |             | ↓ | <20<br>(0.2 h)           | <i>n.d.</i>  | [19]    |   |  |  |              |      |
| 50                            | Arachidonic acid, Methyl ester    |             | — | >20<br>(0.2 h)           | <i>n.d.</i>  | [19]    |   |  |  |              |      |
| <b>Fatty acid esters</b>      |                                   |             |   |                          |              |         |   |  |  |              |      |
| 51                            | 1-Monolaurin                      | 142-18-7    | ↓ | <150<br>(0.2 h)          | <i>n.d.</i>  | [17]    |   |  |  |              | N.A. |
| 52                            | L-Ascorbic acid 6-palmitate       | 137-66-6    | ↓ | 35<br>(0.5, 1 h)         | <i>n.d.</i>  | [20]    |   |  |  |              | N.A. |
| <b>Fatty acids</b>            |                                   |             |   |                          |              |         |   |  |  |              |      |
| 53                            | Arachidonic acid                  | 506-32-1    | ↓ | 5 or <70<br>(0.2, 0.3 h) | 2<br>(20 µM) | [17,19] | ↓ |  |  |              | N.A. |
| 54                            | Decanoic acid                     | 334-48-5    | — | >375<br>(0.3 h)          | <i>n.d.</i>  | [21]    |   |  |  | Marginal     | N.A. |
| 55                            | Docosahexaenoic acid              | 6217-54-5   | ↓ | <20<br>(0.2 h)           | <i>n.d.</i>  | [19]    |   |  |  |              | N.A. |
| 56                            | Eicosanoic acid                   | 506-30-9    | — | >20<br>(0.2 h)           | <i>n.d.</i>  | [19]    |   |  |  |              | N.A. |
| 57                            | Eicosapentaenoic acid             | 10417-94-4  | ↓ | <20<br>(0.2 h)           | <i>n.d.</i>  | [19]    |   |  |  |              | N.A. |
| 58                            | γ-Linolenic Acid                  | 506-26-3    | ↓ | <20<br>(0.2 h)           | <i>n.d.</i>  | [19]    | ↓ |  |  |              | N.A. |
| 59                            | Octanoic acid                     | 124-07-2    | — | >375<br>(0.3 h)          | <i>n.d.</i>  | [21]    |   |  |  |              | N.A. |
| 60                            | PUFA 23:4 (n-6)                   |             | ↓ | >20<br>(0.2 h)           | <i>n.d.</i>  | [19]    |   |  |  |              |      |



| Table 1. Chemicals and their associated health and environmental effects |                                                    |             |                |                        |                   |             |               |              |              |     |                          |               |   |
|--------------------------------------------------------------------------|----------------------------------------------------|-------------|----------------|------------------------|-------------------|-------------|---------------|--------------|--------------|-----|--------------------------|---------------|---|
| Chemical ID                                                              | Chemical Name                                      | Chemical ID | Health Effects | Environmental Effects  | Human Data        | Animal Data | Toxicity Data |              |              |     | Risk Assessment          |               |   |
|                                                                          |                                                    |             |                |                        |                   |             | LD50 (mg/kg)  | NOEL (mg/kg) | LOEL (mg/kg) | MOA | Overall Risk             | Specific Risk |   |
| Furans                                                                   |                                                    |             |                |                        |                   |             |               |              |              |     |                          |               |   |
| 61                                                                       | 3-Chloro-4-methyl-5-hydroxy-2(5H)-furanone         | 112309-61-2 | ↓              | 700<br>(1, 12 h)       | <i>n.d.</i>       | [22]        |               |              |              |     | Low to Moderate          | N.A.          |   |
| 62                                                                       | 3-Chloro-4-(chloromethyl)-5-hydroxyfuran-2(5H)-one | 125974-08-5 | ↓              | 25<br>(1, 12 h)        | <i>n.d.</i>       | [22]        |               |              |              |     | Low-moderate to Moderate | N.A.          |   |
| Ginsenosides                                                             |                                                    |             |                |                        |                   |             |               |              |              |     |                          |               |   |
| 63                                                                       | Ginsenoside-Rb2                                    | 11021-13-9  | —              | >210<br>(1 h)          | <i>n.d.</i>       | [15]        |               |              |              |     |                          | N.A.          |   |
| Halogenated Diphenyl Compounds                                           |                                                    |             |                |                        |                   |             |               |              |              |     |                          |               |   |
| 64                                                                       | 4,4'-Dichlorobenzophenone                          | 90-98-2     | —              | >30<br>( <i>n.s.</i> ) | <i>n.d.</i>       | [23]        |               |              |              |     | Low-moderate             | N.A.          |   |
| Heterocyclic Compounds                                                   |                                                    |             |                |                        |                   |             |               |              |              |     |                          |               |   |
| 65                                                                       | Fenarimol                                          | 60168-88-9  | —              | >50<br>(0.5 h)         | <i>n.d.</i>       | [23]        | E             |              |              |     | Low-moderate             | N.A.          |   |
| Hydroquinone derivates                                                   |                                                    |             |                |                        |                   |             |               |              |              |     |                          |               |   |
| 66                                                                       | Tetrachlorohydroquinone                            | 87-87-6     | —              | >75<br>(1 h)           | <i>n.d.</i>       | [24]        |               |              |              |     | Moderate                 | N.A.          |   |
| 67                                                                       | tert-Butylhydroquinone                             | 1948-33-0   | —              | >10<br>(0.5 h)         | <i>n.d.</i>       | [18]        |               | —            | E            | E   |                          | N.A.          |   |
| Hydroxybenzoic acids                                                     |                                                    |             |                |                        |                   |             |               |              |              |     |                          |               |   |
| 68                                                                       | Propyl gallate                                     | 121-79-9    | —              | >200<br>(1 h)          | <i>n.d.</i>       | [25]        |               |              |              |     |                          | +             |   |
| Inorganic compounds                                                      |                                                    |             |                |                        |                   |             |               |              |              |     |                          |               |   |
| 69                                                                       | Arsenic trioxide                                   | 15502-74-6  | ↓              | 25<br>(8 h)            | 1152<br>(13 μM)   | [28]        |               |              |              |     | High                     | N.A.          |   |
| Lysophospholipids                                                        |                                                    |             |                |                        |                   |             |               |              |              |     |                          |               |   |
| 70                                                                       | Lysophosphatidic acid                              | 325465-93-8 | ↓              | <25<br>(0.25 h)        | <i>n.d.</i>       | [29]        |               |              |              |     |                          | N.A.          |   |
| Metals                                                                   |                                                    |             |                |                        |                   |             |               |              |              |     |                          |               |   |
| 71                                                                       | Cadmium chloride                                   | 10108-64-2  | ↓              | 25<br>(4 h)            | 30<br>(200 μM)    | [30]        | —             | E            | +            | +   | High                     | Group 1       | + |
| Monocarboxylic acid amides                                               |                                                    |             |                |                        |                   |             |               |              |              |     |                          |               |   |
| 72                                                                       | Flutamide                                          | 13311-84-7  | —              | >100<br>(0.5-24 h)     | >1440<br>(100 μM) | [10]        |               |              |              |     | Moderate                 | +             |   |
| 73                                                                       | DEET                                               | 134-62-3    | ↓              | >1000<br>(0.5 h)       | <i>n.d.</i>       | [31]        |               |              |              |     |                          | +             |   |

|                          |                                |                     |   |                              |                 |                  |   |   |   |   |                           |          |   |
|--------------------------|--------------------------------|---------------------|---|------------------------------|-----------------|------------------|---|---|---|---|---------------------------|----------|---|
| Methoxychlor metabolites |                                |                     |   |                              |                 |                  |   |   |   |   |                           |          |   |
| 74                       | HPTE                           | 2971-36-0           | ↓ | 100<br>(0.5-24 h)            | 360<br>(100 μM) | [10]             |   |   |   |   |                           | N.A.     |   |
| Nanoparticles            |                                |                     |   |                              |                 |                  |   |   |   |   |                           |          |   |
| 75                       | SWCNTs                         |                     | — | >26<br>(0.5, 24 h)           | n.d.            | [32]             |   |   |   |   |                           | N.A.     |   |
| Organic peroxides        |                                |                     |   |                              |                 |                  |   |   |   |   |                           |          |   |
| 76                       | Benzoylperoxide                | 94-36-0             | ↓ | 150 or <200<br>(0.25, 0.3 h) | 10<br>(50 μM)   | [17,33]          |   |   |   |   | Group 3                   | +        |   |
| 77                       | Dicumyl peroxide               | 80-43-3             | ↓ | 10 or <50<br>(0.25, 0.3 h)   | 10<br>(200 μM)  | [17,33]          |   |   |   |   |                           | N.A.     |   |
| 78                       | Di-tert-butyl peroxide         | 110-05-4            | — | >200<br>(0.25 h)             | n.d.            | [33]             |   |   |   |   |                           | N.A.     |   |
| Organobromine compounds  |                                |                     |   |                              |                 |                  |   |   |   |   |                           |          |   |
| 79                       | Bromopropylate                 | 18181-80-1          | ↓ | <20<br>(0.5 h)               | n.d.            | [34]             | ↓ |   |   |   |                           | N.A.     |   |
| Organochlorine compounds |                                |                     |   |                              |                 |                  |   |   |   |   |                           |          |   |
| 80                       | 2,4-Dichlorophenoxyacetic acid | 94-75-7             | ↓ | >450<br>(1 h)                | n.d.            | [14]             | ↓ | — | E | E | Low                       | Group 2B | + |
| 81                       | Alachlor                       | 15972-60-8          | ↓ | <186 to 149<br>(0.4, 1 h)    | 10<br>(186 μM)  | [14,17]          |   |   |   |   |                           |          | + |
| 82                       | Atrazine                       | 1912-24-9           | — | >463<br>(0-20 h)             | >20<br>(463 μM) | [14]             |   | — | E | E | Low-moderate to Moderate  | Group 3  | + |
| 83                       | Chlorobenzilate                | 510-15-6            | ↓ | <25<br>(0.5 h)               | n.d.            | [23,34]          | ↓ | — | I | — |                           | Group 3  | + |
| 84                       | DDT (p,p' or o,p')             | 50-29-3 or 789-02-6 | ↓ | 13 to 40 (0.25-1 h)          | 35<br>(30 μM)   | [17,18,31,34–36] | ↓ |   |   |   | Low-moderate to Moderate  | Group 2A | + |
| 85                       | Dicofol                        | 115-32-2            | ↓ | <10 to 30<br>(0.5 h)         | n.d.            | [34]             | ↓ |   |   |   | Low to Moderate           | Group 3  | + |
| 86                       | Dieldrin                       | 60-57-1             | ↓ | <25 or <10<br>(0.5, 1 h)     | n.d.            | [11,37]          | ↓ | — | E | E | Marginal to High-moderate | Group 2A | + |
| 87                       | Lindane                        | 58-89-9             | ↓ | 43 to <70<br>(0.25-1 h)      | 10<br>(52 μM)   | [14,17,35]       |   |   |   |   | Moderate                  | Group 1  | + |

|                             |                                           |            |     |                                        |                |                  |   |   |   |   |               |          |      |
|-----------------------------|-------------------------------------------|------------|-----|----------------------------------------|----------------|------------------|---|---|---|---|---------------|----------|------|
| 88                          | Methoxychlor                              | 72-43-5    | ↓   | 10<br>(0.5 h)                          | 4<br>(25 µM)   | [10]             | ↓ | — | E | E |               | Group 3  | +    |
| 89                          | Ochratoxin A                              | 303-47-9   | ↓   | >4<br>(16 h)                           | 960<br>(3 µM)  | [38]             | — | — | + | E | Low           | Group 2B | +    |
| 90                          | Pentachlorophenol                         | 87-86-5    | ↓   | <50<br>(0.2, 0.3 h)<br>>40<br>(1-24 h) | <i>n.d.</i>    | [17,24,35]       |   |   |   |   | Moderate      | Group 1  | +    |
| <b>Organophosphates</b>     |                                           |            |     |                                        |                |                  |   |   |   |   |               |          |      |
| 91                          | Malathion                                 | 121-75-5   | ↓   | 600<br>(0.25 h)                        | 35<br>(500 µM) | [31]             |   | — | + | E |               | Group 2A | +    |
| <b>Organosulfonic acids</b> |                                           |            |     |                                        |                |                  |   |   |   |   |               |          |      |
| 92                          | Octanesulfonic acid                       | 3944-72-7  | —   | >375<br>(0.3 h)                        | <i>n.d.</i>    | [21]             |   |   |   |   |               |          | N.A. |
| <b>Organotin compounds</b>  |                                           |            |     |                                        |                |                  |   |   |   |   |               |          |      |
| 93                          | Triphenyltin chloride                     | 639-58-7   | ↓   | 3<br>(0.5 h)                           | 25<br>(4 µM)   | [39]             |   |   |   |   |               |          | +    |
| <b>Oxazolidinones</b>       |                                           |            |     |                                        |                |                  |   |   |   |   |               |          |      |
| 94                          | Vinclozolin                               | 50471-44-8 | ↓   | 126<br>(0.5 h)                         | 1<br>(250 µM)  | [10]             |   |   |   |   | Marginal      |          | +    |
| <b>Oxoanions</b>            |                                           |            |     |                                        |                |                  |   |   |   |   |               |          |      |
| 95                          | Peroxyxynitrite                           | 19059-14-4 | ↓   | <150<br>(0.07 h)                       | <i>n.d.</i>    | [40]             |   |   |   |   |               |          | N.A. |
| <b>PAH metabolites</b>      |                                           |            |     |                                        |                |                  |   |   |   |   |               |          |      |
| 96                          | Benzo[a]pyrene-7,8-diol-9,10-epoxide      | 55097-80-8 | ↓   | 0.1<br>(0.5 h)                         | 20<br>(1 µM)   | [41]             |   |   |   |   |               |          |      |
| <b>PAHs</b>                 |                                           |            |     |                                        |                |                  |   |   |   |   |               |          |      |
| 97                          | 4H-Cyclopentano[ <i>def</i> ]phenanthrene | 203-64-5   | ↓   | 23<br>(0.5 h)                          | <i>n.d.</i>    | [47]             |   |   |   |   | Low           |          | N.A. |
| 98                          | 7,12-dimethylbenz[a]anthracene            | 57-97-6    | ↓   | 21<br>(0.5 h)                          | <i>n.d.</i>    | [47,48]          | — | + | + | + | High-moderate |          | +    |
| 99                          | Anthracene                                | 120-12-7   | —/↓ | >350<br>(0.25-1.5 h)                   | <i>n.d.</i>    | [42,43,45–47,49] |   |   |   |   | Marginal      | Group 3  | +    |
| 100                         | Benz[a]anthracene                         | 56-55-3    | ↓   | >100<br>(0.5 h)                        | <i>n.d.</i>    | [47]             | — | + | E | E | Low-moderate  | Group 2B | +    |
| 101                         | Benzo[a]perylene                          | 191-85-5   | —   | >100<br>(0.5 h)                        | <i>n.d.</i>    | [47]             |   |   |   |   | High-moderate |          | N.A. |
| 102                         | Benzo[a]pyrene                            | 50-32-8    | ↓   | 10 to 100                              | <i>n.d.</i>    | [41,47–49]       | — | + | + | + | High          | Group 1  | +    |

| Table 1. Comparison of the predicted and observed carcinogenicity of PAHs |                          |            |                           |                          |             |              |                          |              |            |              |              |          |          |          |         |      |
|---------------------------------------------------------------------------|--------------------------|------------|---------------------------|--------------------------|-------------|--------------|--------------------------|--------------|------------|--------------|--------------|----------|----------|----------|---------|------|
| Index                                                                     | Chemical name            | CAS number | Predicted carcinogenicity |                          |             |              | Observed carcinogenicity |              |            |              |              |          |          |          |         |      |
|                                                                           |                          |            | PAHs                      | PAHs (0.5-1.5 h)         | PAHs (1 h)  | PAHs (0.5 h) | PAHs                     | PAHs (0.5 h) | PAHs (1 h) |              |              |          |          |          |         |      |
| 103                                                                       | Benzo[b]chrysene         | 214-17-5   | —                         | >100 (1 h)               | <i>n.d.</i> | [50]         |                          |              |            | Marginal     | Group 3      | N.A.     |          |          |         |      |
| 104                                                                       | Benzo[b]fluoranthene     | 205-99-2   | ↓                         | >100 (0.5 h)             | <i>n.d.</i> | [47]         |                          |              |            | Low          | Group 2B     | +        |          |          |         |      |
| 105                                                                       | Benzo[c]chrysene         | 194-69-4   | ↓                         | 111 (1 h)                | <i>n.d.</i> | [50]         |                          |              |            | Moderate     |              | N.A.     |          |          |         |      |
| 106                                                                       | Benzo[c]phenanthrene     | 195-19-7   | ↓                         | 29 (0.5 h)               | <i>n.d.</i> | [47]         |                          |              |            | Low-moderate | Group 2B     | N.A.     |          |          |         |      |
| 107                                                                       | Benzo[e]pyrene           | 192-97-2   | E                         | >100 or >79 (0.5, 1.5 h) | <i>n.d.</i> | [47,49]      | —                        |              |            |              | Marginal     | Group 3  | +        |          |         |      |
| 108                                                                       | Benzo[g]chrysene         | 196-78-1   | ↓                         | 60 (1 h)                 | <i>n.d.</i> | [50]         | Moderate                 |              |            |              | Group 3      | N.A.     |          |          |         |      |
| 109                                                                       | Benzo[ghi]perylene       | 191-24-2   | ↓                         | >100 (0.5 h)             | <i>n.d.</i> | [47]         | Marginal                 |              |            |              | Group 3      | +        |          |          |         |      |
| 110                                                                       | Benzo[j]fluoranthene     | 205-82-3   | —                         | >100 (0.5 h)             | <i>n.d.</i> | [47]         |                          |              |            |              | Group 2B     | +        |          |          |         |      |
| 111                                                                       | Benzo[k]fluoranthene     | 207-08-9   | —                         | >100 (0.5 h)             | <i>n.d.</i> | [47]         |                          |              |            |              | Group 2B     | +        |          |          |         |      |
| 112                                                                       | Chrysene                 | 218-01-9   | ↓                         | >100 (0.5 h)             | <i>n.d.</i> | [47]         |                          |              |            |              | Low-moderate | Group 2B | +        |          |         |      |
| 113                                                                       | Coronene                 | 191-07-1   | —                         | >100 (0.5 h)             | <i>n.d.</i> | [47]         |                          |              |            |              |              | Group 3  | N.A.     |          |         |      |
| 114                                                                       | Cyclopenta[cd]pyrene     | 27208-37-3 | ↓                         | 28 (0.5 h)               | <i>n.d.</i> | [47]         |                          |              |            |              | +            | +        | +        | Group 2A | +       |      |
| 115                                                                       | Dibenz[a,c]anthracene    | 215-58-7   | E                         | >100 or 42 (1, 0.5 h)    | <i>n.d.</i> | [47,50]      |                          |              |            |              | Low-moderate | Group 3  | N.A.     |          |         |      |
| 116                                                                       | Dibenz[a,h]anthracene    | 53-70-3    | —                         | >100 (0.5, 1 h)          | <i>n.d.</i> | [47,50]      |                          |              |            |              | +            | +        | +        | High     |         | +    |
| 117                                                                       | Dibenz[a,j]anthracene    | 224-41-9   | E                         | >100 (0.5, 1 h)          | <i>n.d.</i> | [47,50]      |                          |              |            |              |              |          |          | Moderate | Group 3 | N.A. |
| 118                                                                       | Dibenzo[a,e]fluoranthene | 5385-75-1  | —                         | >100 (0.5 h)             | <i>n.d.</i> | [47]         |                          |              |            |              |              |          |          | Marginal | Group 3 | N.A. |
| 119                                                                       | Dibenzo[a,e]pyrene       | 192-65-4   | ↓                         | >100 (0.5 h)             | <i>n.d.</i> | [47]         |                          |              |            |              |              | Moderate | Group 3  | +        |         |      |
| 120                                                                       | Dibenzo[a,h]pyrene       | 189-64-0   | ↓                         | >100 (0.5 h)             | <i>n.d.</i> | [47]         |                          |              |            |              |              | High     | Group 2B | +        |         |      |
| 121                                                                       | Dibenzo[a,i]pyrene       | 189-55-9   | —                         | >100 (0.5 h)             | <i>n.d.</i> | [47]         |                          |              |            |              |              | High     | Group 2B | +        |         |      |
| 122                                                                       | Dibenzo[a,k]fluoranthene | 84030-79-5 | —                         | >100                     | <i>n.d.</i> | [47]         |                          |              |            |              |              |          |          |          |         | N.A. |

|                         |                            |            |   |                         |             |                              |   |   |   |  |              |          |      |
|-------------------------|----------------------------|------------|---|-------------------------|-------------|------------------------------|---|---|---|--|--------------|----------|------|
| 123                     | Dibenzo[a,l]pyrene         | 191-30-0   | ↓ | (0.5 h)<br>>100         | <i>n.d.</i> | [47]                         |   |   |   |  | High         | Group 2A | +    |
| 124                     | Fluoranthene               | 206-44-0   | ↓ | (0.5 h)<br>9 to <70     | 3 or 10     | [17,26,35,43,45,47,49,51,52] |   |   |   |  |              | Group 3  | +    |
| 125                     | Fluorene                   | 86-73-7    | ↓ | (0.2-24 h)<br>38 to >90 | 2           | [17,43,45,47,49]             |   |   |   |  | Marginal     | Group 3  | +    |
| 126                     | Indeno[1,2,3-cd]pyrene     | 193-39-5   | — | (0.17-1.5 h)<br>>100    | <i>n.d.</i> | [47]                         |   |   |   |  | Low          | Group 2B | +    |
| 127                     | Naphthalene                | 91-20-3    | ↓ | (0.5 h)<br>>350         | <i>n.d.</i> | [45,49]                      |   |   |   |  |              | Group 2B | +    |
| 128                     | Naphtho[2,3-a]pyrene       | 196-42-9   | — | (0.07 h)<br>>100        | <i>n.d.</i> | [47]                         |   |   |   |  | Low-moderate |          | N.A. |
| 129                     | Perylene                   | 198-55-0   | — | (0.5 h)<br>>100         | <i>n.d.</i> | [47]                         |   |   |   |  | Low          | Group 3  | +    |
| 130                     | Phenanthrene               | 85-01-8    | ↓ | (0.5 h)<br>28 to <70    | 3           | [17,43,45,47,49,51]          |   |   |   |  | Low          | Group 3  | +    |
| 131                     | Picene                     | 213-46-7   | ↓ | (0.17-1.5 h)<br>>80     | <i>n.d.</i> | [47]                         |   |   |   |  |              |          |      |
| 132                     | Pyrene                     | 129-00-0   | ↓ | (24 h)<br>13            | <i>n.d.</i> | [47]                         |   |   |   |  | Moderate     | Group 3  | N.A. |
| 133                     | Triphenylene               | 217-59-4   | ↓ | (0.5 h)<br>25 to 74     | 15          | [17,47,49,51,53,54]          | + | — | E |  | Low          | Group 3  | +    |
|                         |                            |            |   | (0.2-1.5 h)<br>>80      | (49 µM)     |                              |   |   |   |  |              |          |      |
|                         |                            |            |   | (24 h)<br>>100          | <i>n.d.</i> | [47]                         |   |   |   |  | Low          | Group 3  | N.A. |
|                         |                            |            |   | (0.5 h)                 |             |                              |   |   |   |  |              |          |      |
| <b>PAHs chlorinated</b> |                            |            |   |                         |             |                              |   |   |   |  |              |          |      |
| 134                     | 1-Chloroanthracene         | 4985-70-0  | ↓ | (0.25 h)<br>45          | 3           | [46]                         |   |   |   |  | Marginal     |          | N.A. |
| 135                     | 2-Chloroanthracene         | 17135-78-3 | — | (0.25 h)<br>>350        | <i>n.d.</i> | [46]                         |   |   |   |  | Marginal     |          | N.A. |
| 136                     | 9-Chloroanthracene         | 716-53-0   | ↓ | (0.25 h)<br>42          | 3           | [46]                         |   |   |   |  | Marginal     |          | N.A. |
|                         |                            |            |   | (0.25 h)                | (80 µM)     |                              |   |   |   |  |              |          |      |
| <b>PAHs methylated</b>  |                            |            |   |                         |             |                              |   |   |   |  |              |          |      |
| 137                     | 10-Methylbenz[a]anthracene | 2381-15-9  | ↓ | (0.5 h)<br>25           | <i>n.d.</i> | [48]                         |   |   |   |  | Marginal     |          | N.A. |
| 138                     | 11-Methylbenz[a]anthracene | 6111-78-0  | ↓ | (0.5 h)<br>14           | <i>n.d.</i> | [48]                         |   |   |   |  | Marginal     |          | N.A. |
|                         |                            |            |   | (0.5 h)                 |             |                              |   |   |   |  |              |          |      |

|     |                            |           |     |                          |                              |               |               |          |      |
|-----|----------------------------|-----------|-----|--------------------------|------------------------------|---------------|---------------|----------|------|
| 139 | 12-Methylbenz[a]anthracene | 2422-79-9 | —   | >50<br>(0.5 h)           | <i>n.d.</i>                  | [48]          | Low-moderate  |          | N.A. |
| 140 | 1-Methylanthracene         | 610-48-0  | ↓   | 11 to 40<br>(0.17–0.5 h) | 2-10<br>(32–75 µM)           | [10,17,42–46] | Marginal      |          | N.A. |
| 141 | 1-Methylbenz[a]anthracene  | 2498-77-3 | ↓   | 10<br>(0.5 h)            | <i>n.d.</i>                  | [48]          | Marginal      |          | N.A. |
| 142 | 1-Methylchrysene           | 3351-28-8 | —   | >80<br>(1 h)             | <i>n.d.</i>                  | [55]          | Marginal      | Group 3  | N.A. |
| 143 | 1-Methylfluorene           | 1730-37-6 | ↓   | <70 to 25<br>(0.2–1 h)   | 2<br>(80 µM)                 | [17,43,45,49] |               |          | N.A. |
| 144 | 1-Methylnaphthalene        | 90-12-0   | ↓   | 200 or <225<br>(0.07 h)  | 0.4 or 0.9<br>(200 µM)       | [43,45]       |               |          | +    |
| 145 | 1-Methylpyrene             | 2381-21-7 | ↓   | 24 or <70 (0.2, 0.5 h)   | <i>n.d.</i>                  | [17,47]       | Marginal      |          | N.A. |
| 146 | 2-Methylanthracene         | 613-12-7  | —/↓ | >400<br>(0.17–0.5 h)     | >480<br>(75 µM)              | [42–46]       | Marginal      |          | N.A. |
| 147 | 2-Methylbenz[a]anthracene  | 2498-76-2 | ↓   | 15<br>(0.5 h)            | <i>n.d.</i>                  | [48]          | Low           |          | N.A. |
| 148 | 2-Methylchrysene           | 3351-32-4 | —   | >80<br>(1 h)             | <i>n.d.</i>                  | [55]          | Low-moderate  | Group 3  | N.A. |
| 149 | 2-Methylnaphthalene        | 91-57-6   | ↓   | >350<br>(0.07 h)         | 0.8 or 0.45<br>(325, 320 µM) | [43,45]       |               |          | N.A. |
| 150 | 3-Methylbenz[a]anthracene  | 2498-75-1 | —   | >50<br>(0.5 h)           | <i>n.d.</i>                  | [48]          | Marginal      |          | N.A. |
| 151 | 3-Methylchrysene           | 3351-31-3 | —   | >80<br>(1 h)             | <i>n.d.</i>                  | [55]          | Low-moderate  | Group 3  | N.A. |
| 152 | 4-Methylbenz[a]anthracene  | 316-49-4  | —   | >50<br>(0.5 h)           | <i>n.d.</i>                  | [48]          | Moderate      |          | N.A. |
| 153 | 4-Methylchrysene           | 3351-30-2 | —   | >80<br>(1 h)             | <i>n.d.</i>                  | [55]          | Low-moderate  | Group 3  | N.A. |
| 154 | 5-Methylbenz[a]anthracene  | 2319-96-2 | —   | >50<br>(0.5 h)           | <i>n.d.</i>                  | [48]          | Marginal      |          | N.A. |
| 155 | 5-Methylchrysene           | 3697-24-3 | ↓   | 12 or 18<br>(0.5, 1 h)   | <i>n.d.</i>                  | [47,55]       | High          | Group 2B | +    |
| 156 | 6-Methylbenz[a]anthracene  | 316-14-3  | —   | >50<br>(0.5 h)           | <i>n.d.</i>                  | [48]          | Moderate      |          | N.A. |
| 157 | 6-Methylchrysene           | 1705-85-7 | ↓   | 37<br>(1 h)              | <i>n.d.</i>                  | [55]          | Low-moderate  | Group 3  | N.A. |
| 158 | 7-Methylbenz[a]anthracene  | 2541-69-7 | —   | >50<br>(0.5 h)           | <i>n.d.</i>                  | [48]          | High-moderate |          | N.A. |

|                                        |                                       |            |   |                               |                             |                  |   |   |   |          |                       |      |
|----------------------------------------|---------------------------------------|------------|---|-------------------------------|-----------------------------|------------------|---|---|---|----------|-----------------------|------|
| 159                                    | 8-Methylbenz[a]anthracene             | 2381-31-9  | ↓ | 13<br>(0.5 h)                 | <i>n.d.</i>                 | [48]             |   |   |   |          | Moderate              | N.A. |
| 160                                    | 9,10-Dimethylanthracene               | 781-43-1   | ↓ | 45 to <70<br>(0.17 to 0.25 h) | 2 to 3<br>(50 to 70<br>μM)  | [17,43,45,46]    |   |   |   |          | Uncertain/<br>Unknown | N.A. |
| 161                                    | 9-Methylanthracene                    | 779-02-2   | ↓ | 26 to <50<br>(0.17-1.5 h)     | 2 to 15<br>(37 to 70<br>μM) | [42,43,45,46,49] |   |   |   |          | Marginal              | N.A. |
| 162                                    | 9-Methylbenz[a]anthracene             | 2381-16-0  | — | >50<br>(0.5 h)                | <i>n.d.</i>                 | [48]             |   |   |   |          | Marginal              | N.A. |
| <b>PAHs N-heterocyclic</b>             |                                       |            |   |                               |                             |                  |   |   |   |          |                       |      |
| 163                                    | Dinaphtho[2,1-b:2',3'-d]furan         | 204-91-1   | — | >50<br>(0.5 h)                | <i>n.d.</i>                 | [56]             |   |   |   |          |                       | N.A. |
| 164                                    | 7H-Dibenzo[c,g]carbazole              | 194-59-2   | ↓ | 12<br>(0.5-24 h)              | <i>n.d.</i>                 | [57]             | + | E | E | Marginal | Group<br>2B           | +    |
| 165                                    | N-Methyl-7H-dibenzo[c,g]carbazole     | 27093-62-5 | ↓ | 41<br>(0.5 h)                 | <i>n.d.</i>                 | [57]             | + | + | + |          |                       | N.A. |
| <b>PAHs N-heterocyclic, methylated</b> |                                       |            |   |                               |                             |                  |   |   |   |          |                       |      |
| 166                                    | 5,9-Dimethyl-7H-dibenzo[c,g]carbazole | 88193-04-8 | ↓ | 39<br>(0.5 h)                 | <i>n.d.</i>                 | [57]             | + | E | E |          |                       | N.A. |
| <b>PAHs O-heterocyclic</b>             |                                       |            |   |                               |                             |                  |   |   |   |          |                       |      |
| 167                                    | Dinaphtho[1,2-b:1',2'-d]furan         | 68518-20-7 | — | >50<br>(0.5 h)                | <i>n.d.</i>                 | [56]             |   |   |   |          |                       | N.A. |
| 168                                    | Dinaphtho[1,2-b:2',1'-d]furan         | 239-69-0   | — | >50<br>(0.5 h)                | <i>n.d.</i>                 | [56]             |   |   |   |          |                       | N.A. |
| 169                                    | Dinaphtho[1,2-b:2',3'-d]furan         | 239-90-7   | — | >50<br>(0.5 h)                | <i>n.d.</i>                 | [56]             |   |   |   |          |                       | N.A. |
| 170                                    | Dinaphtho[2,1-b:1',2'-d]furan         | 194-63-8   | — | >50<br>(0.5 h)                | <i>n.d.</i>                 | [56]             |   |   |   |          |                       | N.A. |
| 171                                    | Dinaphtho[2,3-b:2',3'-d]furan         | 242-51-3   | — | >50<br>(0.5 h)                | <i>n.d.</i>                 | [56]             |   |   |   |          |                       | N.A. |
| <b>PBBs</b>                            |                                       |            |   |                               |                             |                  |   |   |   |          |                       |      |
| 172                                    | 2,2',4,4',5,5'-Hexabromobiphenyl      | 59080-40-9 | ↓ | 5<br>(12 h)                   | <i>n.d.</i>                 | [58]             |   |   |   |          | Low-moderate          | N.A. |
| <b>PCBs</b>                            |                                       |            |   |                               |                             |                  |   |   |   |          |                       |      |
| 173                                    | PCB 18                                | 37680-65-2 | ↓ | 10<br>(0.5 h)                 | <i>n.d.</i>                 | [59]             |   |   |   |          | Marginal              | N.A. |
| 174                                    | PCB 19                                | 38444-73-4 | ↓ | 6<br>(1 h)                    | <i>n.d.</i>                 | [60]             |   |   |   |          | Marginal              | N.A. |

|     |         |            |   |                        |             |         |              |           |
|-----|---------|------------|---|------------------------|-------------|---------|--------------|-----------|
| 175 | PCB 28  | 7012-37-5  | ↓ | 15 or 31<br>(1, 0.5 h) | <i>n.d.</i> | [59,60] | Low-moderate | N.A.      |
| 176 | PCB 31  | 16606-02-3 | ↓ | 16<br>(0.5 h)          | <i>n.d.</i> | [59]    | Marginal     | N.A.      |
| 177 | PCB 47  | 2437-79-8  | ↓ | 10 or 13<br>(0.5, 1 h) | <i>n.d.</i> | [59,60] | Low-moderate | N.A.      |
| 178 | PCB 49  | 41464-40-8 | ↓ | 19<br>(0.5 h)          | <i>n.d.</i> | [59]    | Low-moderate | N.A.      |
| 179 | PCB 51  | 68194-04-7 | ↓ | 7<br>(1 h)             | <i>n.d.</i> | [60]    | Marginal     | N.A.      |
| 180 | PCB 52  | 35693-99-3 | ↓ | 9 or 24<br>(1, 0.5 h)  | <i>n.d.</i> | [59,60] | Low-moderate | N.A.      |
| 181 | PCB 53  | 41464-41-9 | ↓ | 6<br>(1 h)             | <i>n.d.</i> | [60]    | Marginal     | N.A.      |
| 182 | PCB 66  | 32598-10-0 | ↓ | 16<br>(0.5 h)          | <i>n.d.</i> | [59]    | Low-moderate | N.A.      |
| 183 | PCB 70  | 32598-11-1 | ↓ | 19<br>(0.5 h)          | <i>n.d.</i> | [59]    | Low-moderate | N.A.      |
| 184 | PCB 74  | 32690-93-0 | ↓ | 11 or 18<br>(0.5, 1 h) | <i>n.d.</i> | [59,60] | Low-moderate | N.A.      |
| 185 | PCB 77  | 32598-13-3 | — | >100<br>(0.5 h)        | <i>n.d.</i> | [59]    | Moderate     | Group 1 + |
| 186 | PCB 80  | 33284-52-5 | — | >50<br>(0.5 h)         | <i>n.d.</i> | [60]    | Low-moderate | N.A.      |
| 187 | PCB 81  | 70362-50-4 | — | >100<br>(0.5 h)        | <i>n.d.</i> | [59]    | Moderate     | Group 1 + |
| 188 | PCB 95  | 38379-99-6 | ↓ | 8 or 17<br>(1, 0.5 h)  | <i>n.d.</i> | [59,60] | Marginal     | N.A.      |
| 189 | PCB 99  | 38380-01-7 | ↓ | 22<br>(0.5 h)          | <i>n.d.</i> | [59]    | Low-moderate | N.A.      |
| 190 | PCB 100 | 39485-83-1 | ↓ | 16<br>(1 h)            | <i>n.d.</i> | [60]    | Marginal     | N.A.      |
| 191 | PCB 101 | 37680-73-2 | ↓ | 13 or 16<br>(1, 0.5 h) | <i>n.d.</i> | [59,60] | Low-moderate | N.A.      |
| 192 | PCB 104 | 56558-16-8 | ↓ | 8<br>(1 h)             | <i>n.d.</i> | [60]    | Marginal     | N.A.      |
| 193 | PCB 105 | 32598-14-4 | ↓ | 21<br>(0.5 h)          | <i>n.d.</i> | [59]    | Low-moderate | Group 1 + |
| 194 | PCB 110 | 38380-03-9 | ↓ | 16<br>(0.5 h)          | <i>n.d.</i> | [59]    | Low-moderate | N.A.      |



|     |         |            |   |                                   |                            |               |               |         |      |
|-----|---------|------------|---|-----------------------------------|----------------------------|---------------|---------------|---------|------|
| 195 | PCB 114 | 74472-37-0 | ↓ | <b>23</b><br>(0.5 h)              | <i>n.d.</i>                | [59]          | Low-moderate  | Group 1 | +    |
| 196 | PCB 118 | 31508-00-6 | ↓ | <b>17 or 19</b><br>(0.5, 1 h)     | <i>n.d.</i>                | [59,60]       | Low-moderate  | Group 1 | +    |
| 197 | PCB 119 | 56558-17-9 | ↓ | <b>26</b><br>(0.5 h)              | <i>n.d.</i>                | [59]          | Low-moderate  |         | N.A. |
| 198 | PCB 122 | 76842-07-4 | ↓ | <b>22</b><br>(1 h)                | <i>n.d.</i>                | [60]          | Low-moderate  |         | N.A. |
| 199 | PCB 123 | 65510-44-3 | ↓ | <b>18</b><br>(0.5 h)              | <i>n.d.</i>                | [59]          | Low-moderate  | Group 1 | +    |
| 200 | PCB 125 | 74472-39-2 | ↓ | <b>13</b><br>(1 h)                | <i>n.d.</i>                | [60]          | Low-moderate  |         | N.A. |
| 201 | PCB 126 | 57465-28-8 | — | <b>&gt;50</b><br>(0.5, 1 h)       | <b>&gt;2880</b><br>(50 µM) | [59,60]       | High-moderate | Group 1 | +    |
| 202 | PCB 128 | 38380-07-3 | ↓ | <b>13</b><br>(1 h)                | <i>n.d.</i>                | [60]          | Marginal      |         | N.A. |
| 203 | PCB 129 | 55215-18-4 | ↓ | <b>23</b><br>(0.5 h)              | <i>n.d.</i>                | [59]          | Low-moderate  |         | N.A. |
| 204 | PCB 132 | 38380-05-1 | ↓ | <b>18</b><br>(0.5 h)              | <i>n.d.</i>                | [59]          | Marginal      |         | N.A. |
| 205 | PCB 136 | 38411-22-2 | ↓ | <b>5 or 16</b><br>(1, 0.5 h)      | <i>n.d.</i>                | [59,60]       | Marginal      |         | N.A. |
| 206 | PCB 138 | 35065-28-2 | ↓ | <b>14 or 20</b><br>(1, 0.5 h)     | <i>n.d.</i>                | [59,60]       | Low-moderate  |         | N.A. |
| 207 | PCB 149 | 38380-04-0 | ↓ | <b>21</b><br>(0.5 h)              | <i>n.d.</i>                | [59]          | Marginal      |         | N.A. |
| 208 | PCB 153 | 35065-27-1 | ↓ | <b>15 to &lt;50</b><br>(0.5-48 h) | <i>n.d.</i>                | [17,52,59-61] | Low-moderate  |         | +    |
| 209 | PCB 156 | 38380-08-4 | ↓ | <b>17</b><br>(0.5 h)              | <i>n.d.</i>                | [59]          | Low-moderate  | Group 1 | +    |
| 210 | PCB 157 | 69782-90-7 | ↓ | <b>16</b><br>(0.5 h)              | <i>n.d.</i>                | [59]          | Low-moderate  | Group 1 | +    |
| 211 | PCB 163 | 74472-44-9 | ↓ | <b>40</b><br>(0.5 h)              | <i>n.d.</i>                | [59]          | Low-moderate  |         | N.A. |
| 212 | PCB 167 | 52663-72-6 | ↓ | <b>22</b><br>(0.5 h)              | <i>n.d.</i>                | [59]          | Low-moderate  | Group 1 | +    |
| 213 | PCB 168 | 59291-65-5 | ↓ | <b>23</b><br>(1 h)                | <i>n.d.</i>                | [60]          | Low-moderate  |         | N.A. |
| 214 | PCB 169 | 32774-16-6 | — | <b>&gt;100</b><br>(0.5 h)         | <i>n.d.</i>                | [59]          | High-moderate | Group 1 | +    |

|                         |                                              |            |   |                        |             |         |  |  |  |              |         |      |
|-------------------------|----------------------------------------------|------------|---|------------------------|-------------|---------|--|--|--|--------------|---------|------|
| 215                     | PCB 170                                      | 35065-30-6 | ↓ | 30 or 62<br>(1, 0.5 h) | <i>n.d.</i> | [59,60] |  |  |  | Low-moderate |         | N.A. |
| 216                     | PCB 180                                      | 35065-29-3 | ↓ | 43 or 71<br>(1, 0.5 h) | <i>n.d.</i> | [59,60] |  |  |  | Low-moderate |         | +    |
| 217                     | PCB 187                                      | 52663-68-0 | ↓ | 60<br>(0.5 h)          | <i>n.d.</i> | [59]    |  |  |  | Marginal     |         | N.A. |
| 218                     | PCB 189                                      | 39635-31-9 | ↓ | >100<br>(0.5 h)        | <i>n.d.</i> | [59]    |  |  |  | Low-moderate | Group 1 | +    |
| 219                     | PCB 190                                      | 41411-64-7 | ↓ | 23<br>(1 h)            | <i>n.d.</i> | [60]    |  |  |  | Low-moderate |         | N.A. |
| 220                     | PCB 194                                      | 35694-08-7 | — | >100<br>(0.5 h)        | <i>n.d.</i> | [59]    |  |  |  | Low-moderate |         | N.A. |
| <b>PCBs metabolites</b> |                                              |            |   |                        |             |         |  |  |  |              |         |      |
| 221                     | 2-(2',4',5'-tri-Cl-phenyl)-1,4-Hydroquinone  |            | ↓ | >100<br>(0.5 h)        | <i>n.d.</i> | [62]    |  |  |  |              |         |      |
| 222                     | 2-(2'-Cl-phenyl)-1,4-Benzoquinones           |            | ↓ | >100<br>(0.5 h)        | <i>n.d.</i> | [62]    |  |  |  |              |         |      |
| 223                     | 2-(2'-Cl-phenyl)-1,4-Hydroquinone            |            | — | >100<br>(0.5 h)        | <i>n.d.</i> | [62]    |  |  |  |              |         |      |
| 224                     | 2-(3',4',5'-tri-Cl-phenyl)-1,4-Benzoquinones |            | ↓ | 42<br>(0.5 h)          | <i>n.d.</i> | [62]    |  |  |  |              |         |      |
| 225                     | 2-(3',4',5'-tri-Cl-phenyl)-1,4-Hydroquinone  |            | ↓ | >100<br>(0.5 h)        | <i>n.d.</i> | [62]    |  |  |  |              |         |      |
| 226                     | 2-(3',4'-di-Cl-phenyl)-1,4-Benzoquinones     |            | ↓ | 49<br>(0.5 h)          | <i>n.d.</i> | [62]    |  |  |  |              |         |      |
| 227                     | 2-(3',4'-di-Cl-phenyl)-1,4-Hydroquinone      |            | ↓ | >100<br>(0.5 h)        | <i>n.d.</i> | [62]    |  |  |  |              |         |      |
| 228                     | 2-(3',5'-di-Cl-phenyl)-1,4-Benzoquinones     |            | ↓ | 37<br>(0.5 h)          | <i>n.d.</i> | [62]    |  |  |  |              |         |      |
| 229                     | 2-(3',5'-di-Cl-phenyl)-1,4-Hydroquinone      |            | — | >100<br>(0.5 h)        | <i>n.d.</i> | [62]    |  |  |  |              |         |      |
| 230                     | 2-(3'-Cl-phenyl)-1,4-Benzoquinones           |            | ↓ | 70<br>(0.5 h)          | <i>n.d.</i> | [62]    |  |  |  |              |         |      |
| 231                     | 2-(3'-Cl-phenyl)-1,4-Hydroquinone            |            | — | >100<br>(0.5 h)        | <i>n.d.</i> | [62]    |  |  |  |              |         |      |
| 232                     | 2-(4'-Cl-phenyl)-1,4-Benzoquinones           |            | ↓ | 73<br>(0.5 h)          | <i>n.d.</i> | [62]    |  |  |  |              |         |      |
| 233                     | 2-(4'-Cl-phenyl)-1,4-Hydroquinone            |            | ↓ | >100<br>(0.5 h)        | <i>n.d.</i> | [62]    |  |  |  |              |         |      |
| 234                     | 2,2'-Biphenyldiol                            | 1806-29-7  | ↓ | 225                    | 45          | [63]    |  |  |  |              |         | N.A. |

|     |                            |             |   |         |          |      |              |      |
|-----|----------------------------|-------------|---|---------|----------|------|--------------|------|
| 235 | 2'-Hydroxy-PCB 3           | 64181-76-6  | — | (0.5 h) | (250 µM) | [62] | Low-moderate |      |
| 236 | 2-Biphenylol               | 90-43-7     | ↓ | (0.5 h) | >300     | [63] | Group 3      | +    |
| 237 | 3,3'-Biphenyldiol          | 612-76-0    | ↓ | (0.5 h) | >300     | [63] |              |      |
| 238 | 3',4'-Dihydroxy-PCB 3      |             | ↓ | (0.5 h) | 43       | [62] |              |      |
| 239 | 3',4'-Dihydroxy-PCB 5      |             | ↓ | (0.5 h) | 16       | [62] |              |      |
| 240 | 3',4'-Dihydroxy-PCB 12     |             | ↓ | (0.5 h) | 19       | [62] |              |      |
| 241 | 3'-Hydroxy-PCB 3           |             | ↓ | (0.5 h) | 37       | [62] |              |      |
| 242 | 3-Biphenylol               | 580-51-8    | ↓ | (0.5 h) | >300     | [63] |              | N.A. |
| 243 | 3-Chloro-2-biphenylol      | 85-97-2     | ↓ | (0.5 h) | >300     | [63] | Marginal     | N.A. |
| 244 | 4,4'-Dichloro-3-biphenylol | 53459-39-5  | ↓ | (0.5 h) | 30       | [63] | Low-moderate | N.A. |
| 245 | 4'-Hydroxy-PCB 3           |             | ↓ | (0.5 h) | 31       | [62] |              |      |
| 246 | 4'-Hydroxy-PCB 36          |             | ↓ | (0.5 h) | 38       | [62] |              |      |
| 247 | 4'-Hydroxy-PCB 68          |             | ↓ | (0.5 h) | 22       | [62] |              |      |
| 248 | 4'-Hydroxy-PCB 79          |             | ↓ | (0.5 h) | 27       | [62] |              |      |
| 249 | 4-Hydroxy-PCB 14           |             | ↓ | (0.5 h) | 38       | [62] |              |      |
| 250 | 4-Hydroxy-PCB 34           |             | ↓ | (0.5 h) | 32       | [62] |              |      |
| 251 | 4-Hydroxy-PCB 35           |             | ↓ | (0.5 h) | 31       | [62] |              |      |
| 252 | 4-Hydroxy-PCB 36           |             | ↓ | (0.5 h) | 30       | [62] |              |      |
| 253 | 4-Hydroxy-PCB 39           |             | ↓ | (0.5 h) | 27       | [62] |              |      |
| 254 | 4-Hydroxy-PCB 107          | 152969-11-4 | ↓ | (0.5 h) | 20       | [62] | Marginal     | N.A. |

|                  |                                                 |             |   |                                    |                   |                  |   |   |   |   |              |              |
|------------------|-------------------------------------------------|-------------|---|------------------------------------|-------------------|------------------|---|---|---|---|--------------|--------------|
| 255              | 4-Hydroxy-PCB 187                               | 158076-68-7 | ↓ | (0.5 h)<br><b>9</b>                | <i>n.d.</i>       | [62]             |   |   |   |   | Low          | N.A.         |
| 256              | 4-Hydroxy-PCB-146                               |             | ↓ | (0.5 h)<br><b>13</b>               | <i>n.d.</i>       | [62]             |   |   |   |   |              |              |
| 257              | 6'-Hydroxy-PCB 35                               |             | ↓ | (0.5 h)<br><b>24</b>               | <i>n.d.</i>       | [62]             |   |   |   |   |              |              |
| 258              | 6'-Hydroxy-PCB 36                               |             | ↓ | (0.5 h)<br><b>20</b>               | <i>n.d.</i>       | [62]             |   |   |   |   |              |              |
| <b>PCDDs</b>     |                                                 |             |   |                                    |                   |                  |   |   |   |   |              |              |
| 259              | TCDD                                            | 1746-01-6   | ↓ | >0.001<br>(24 h)                   | >48<br>(0.001 µM) | [26,64]          | — |   |   |   | High         | Group 1<br>+ |
| <b>Peptides</b>  |                                                 |             |   |                                    |                   |                  |   |   |   |   |              |              |
| 260              | Cylindrospermopsin                              | 143545-90-8 | — | >60<br>(0.5 h)                     | <i>n.d.</i>       | [52]             |   |   |   |   |              | N.A.         |
| 261              | EGF                                             | 62229-50-9  | ↓ | <0.001 to<br><0.008<br>(0.2-0.5 h) | 2<br>(0.002 µM)   | [17,29,59,65,66] | — |   |   |   |              | N.A.         |
| 262              | Microcystin-LR                                  | 101043-37-2 | — | >100<br>(0.5 h)                    | <i>n.d.</i>       | [52]             |   |   |   |   | Group 2B     | +            |
| 263              | TNFα                                            | 308079-78-9 | ↓ | <0.0003<br>(24 h)                  | <i>n.d.</i>       | [51]             |   |   |   |   |              | N.A.         |
| 264              | TRAP 6                                          | 141136-83-6 | ↓ | <50<br>(0.5 h)                     | <i>n.d.</i>       | [17]             |   |   |   |   |              | N.A.         |
| <b>Peroxides</b> |                                                 |             |   |                                    |                   |                  |   |   |   |   |              |              |
| 265              | Hydrogen peroxide H <sub>2</sub> O <sub>2</sub> | 7722-84-1   | ↓ | <100 to<br>>1000<br>(0.5-1 h)      | <i>n.d.</i>       | [15,20,67-81]    | — | + | + | + |              | Group 3<br>+ |
| <b>PFASs</b>     |                                                 |             |   |                                    |                   |                  |   |   |   |   |              |              |
| 266              | Perfluorobutanesulfonic acid PFBS               | 375-73-5    | — | >160<br>(0.3 h)                    | <i>n.d.</i>       | [82]             |   |   |   |   |              | N.A.         |
| 267              | Perfluorobutanoic acid PFBA                     | 375-22-4    | — | >300<br>(0.3 h)                    | <i>n.d.</i>       | [21]             |   |   |   |   |              | N.A.         |
| 268              | Perfluorodecanoic acid PFDA                     | 335-76-2    | ↓ | 25 or <50<br>(0.3 h)               | 2<br>(350 µM)     | [17,21]          |   |   |   |   | Low-moderate | +            |
| 269              | Perfluoroheptanoic acid PFHpA                   | 375-85-9    | ↓ | 140<br>(0.3 h)                     | <i>n.d.</i>       | [21]             |   |   |   |   |              | N.A.         |
| 270              | Perfluorohexadecanoic acid PFHA                 | 67905-19-5  | — | >300<br>(0.3 h)                    | <i>n.d.</i>       | [21]             |   |   |   |   |              | N.A.         |

|                       |                                   |            |   |                           |                         |                                                         |   |   |   |   |          |      |
|-----------------------|-----------------------------------|------------|---|---------------------------|-------------------------|---------------------------------------------------------|---|---|---|---|----------|------|
| 271                   | Perfluorohexanesulfonic acid PFHS | 355-46-4   | ↓ | 122<br>(0.5 h)            | <i>n.d.</i>             | [82]                                                    |   |   |   |   |          | N.A. |
| 272                   | Perfluorononanoic acid PFNA       | 375-95-1   | ↓ | 90<br>(0.3 h)             | <i>n.d.</i>             | [21]                                                    |   |   |   |   |          | N.A. |
| 273                   | Perfluorooctadecanoic acid PFODA  | 16517-11-6 | — | >300<br>(0.3 h)           | <i>n.d.</i>             | [21]                                                    |   |   |   |   |          | N.A. |
| 274                   | Perfluorooctane sulfonate PFOS    | 1763-23-1  | ↓ | 30 or <40<br>(0.5, 0.3 h) | 2<br>(50 µM)            | [17,82]                                                 |   |   |   |   |          | N.A. |
| 275                   | Perfluorooctanesulfonamide PFOSA  | 754-91-6   | ↓ | 25 or 37<br>(0.3, 0.5 h)  | 2 or 10<br>(50, 350 µM) | [21]                                                    |   |   |   |   |          | N.A. |
| 276                   | Perfluorooctanoic acid PFOA       | 335-67-1   | ↓ | 50 to 100<br>(0.08-0.3 h) | 2<br>(350 µM)           | [17,21,35,83]                                           |   |   |   |   | Group 2B | +    |
| 277                   | Perfluoropentanoic acid PFPeA     | 2706-90-3  | — | >200<br>(0.3 h)           | <i>n.d.</i>             | [21]                                                    |   |   |   |   |          | N.A. |
| 278                   | Perfluoropropanoic acid PFPA      | 422-64-0   | — | >300<br>(0.3 h)           | <i>n.d.</i>             | [21]                                                    |   |   |   |   |          | N.A. |
| 279                   | Trifluoroacetic acid TFA          | 76-05-1    | — | >300<br>(0.3 h)           | <i>n.d.</i>             | [21]                                                    |   |   |   |   |          | N.A. |
| <b>Phenothiazines</b> |                                   |            |   |                           |                         |                                                         |   |   |   |   |          |      |
| 280                   | Mesoridazine                      | 5588-33-0  | ↓ | 5<br>(1 h)                | <i>n.d.</i>             | [37]                                                    |   |   |   |   |          | N.A. |
| <b>Phorbols</b>       |                                   |            |   |                           |                         |                                                         |   |   |   |   |          |      |
| 281                   | TPA                               | 16561-29-8 | ↓ | 0.002 to 0.02<br>(0-1 h)  | <10<br>(0.016 µM)       | [15,17,62,64,66,68,77,84–88,35,89,90,36,47,55–57,59,61] | ↓ |   |   |   |          | +    |
| <b>Phthalates</b>     |                                   |            |   |                           |                         |                                                         |   |   |   |   |          |      |
| 282                   | Benzyl butyl phthalate BBP        | 85-68-7    | ↓ | 21<br>(0.5 h)             | 2<br>(80 µM)            | [91]                                                    |   |   | + | + |          | +    |
| 283                   | Di(2-ethylhexyl) phthalate DEHP   | 117-81-7   | ↓ | >200<br>(0.5 h)           | 207<br>(80 µM)          | [91]                                                    | E | — | — | — | Group 2B | +    |
| 284                   | Diallyl phthalate DAP             | 131-17-9   | ↓ | 100<br>(0.5 h)            | >1440<br>(80 µM)        | [91]                                                    |   | — | + | E |          | N.A. |
| 285                   | Dibutyl phthalate DBP             | 84-74-2    | ↓ | 13<br>(0.5 h)             | 2<br>(80 µM)            | [91]                                                    |   |   |   |   |          | +    |
| 286                   | Dicyclohexyl phthalate DCHP       | 84-61-7    | ↓ | 22<br>(0.5 h)             | 10<br>(80 µM)           | [91]                                                    |   |   |   |   |          | N.A. |
| 287                   | Didecyl phthalate DDP             | 84-77-5    | — | >200<br>(0.5 h)           | >1440<br>(80 µM)        | [91]                                                    |   |   |   |   |          | N.A. |
| 288                   | Diethyl phthalate DEP             | 84-66-2    | — | >200                      | >1440                   | [91]                                                    | — |   |   |   |          | +    |

|                               |                              |             |   |                      |                        |      |   |   |   |                    |  |      |
|-------------------------------|------------------------------|-------------|---|----------------------|------------------------|------|---|---|---|--------------------|--|------|
| 289                           | Diheptyl phthalate DHpP      | 3648-21-3   | ↓ | (0.5 h)              | (80 µM)                | [91] |   |   |   |                    |  | +    |
| 290                           | Diisobutyl phthalate DIBP    | 84-69-5     | ↓ | (0.5 h)              | (80 µM)                | [91] |   |   |   |                    |  |      |
| 291                           | Diisodecyl phthalate DIDP    | 26761-40-0  | — | (0.5 h)              | (80 µM)                | [91] |   |   |   |                    |  | N.A. |
| 292                           | Diisooheptyl phthalate DIHpP | 41451-28-9  | ↓ | (0.5 h)              | (80 µM)                | [91] |   |   |   |                    |  | N.A. |
| 293                           | Diisononyl phthalate DINP    | 28553-12-0  | ↓ | (0.5 h)              | (80 µM)                | [91] |   |   |   |                    |  | N.A. |
| 294                           | Diisopropyl phthalate DIPrP  | 605-45-8    | ↓ | (0.5 h)              | (80 µM)                | [91] |   |   |   |                    |  | N.A. |
| 295                           | Dimethyl phthalate DMP       | 131-11-3    | — | (0.5 h)              | (80 µM)                | [91] |   |   |   |                    |  | +    |
| 296                           | Diocetyl phthalate DOP       | 117-84-0    | ↓ | (0.5 h)              | (80 µM)                | [91] |   |   |   |                    |  | +    |
| 297                           | Dipentyl phthalate DPpP      | 131-18-0    | ↓ | (0.5 h)              | (80 µM)                | [91] |   |   |   |                    |  | N.A. |
| 298                           | Diphenyl phthalate DPhP      | 84-62-8     | ↓ | (0.5 h)              | (80 µM)                | [91] |   |   |   |                    |  | N.A. |
| 299                           | Dipropyl phthalate DPrP      | 131-16-8    | ↓ | (0.5 h)              | (80 µM)                | [91] |   |   |   |                    |  | N.A. |
| 300                           | Monobutyl phthalate MBP      | 131-70-4    | — | (0.5 h)              | (80 µM)                | [91] |   |   |   |                    |  | N.A. |
| 301                           | Monomethyl phthalate MMP     | 4376-18-5   | — | (0.5 h)              | (80 µM)                | [91] |   |   |   |                    |  | N.A. |
| <b>Piperidines</b>            |                              |             |   |                      |                        |      |   |   |   |                    |  |      |
| 302                           | Thioridazine                 | 50-52-2     | ↓ | 5<br>(1 h)           | 5<br>(10 µM)           | [37] |   |   |   |                    |  | N.A. |
| <b>Platinum compounds</b>     |                              |             |   |                      |                        |      |   |   |   |                    |  |      |
| 303                           | Cisplatin                    | 15663-27-1  | — | >10<br>(0-8 h)       | >480<br>(10 µM)        | [90] | + | + | + | Moderate           |  | +    |
| 304                           | Platinum complex LA-12       | 250611-20-2 | ↓ | 1 or 1.5<br>(2, 3 h) | 40 or 60<br>(10, 8 µM) | [90] |   |   |   |                    |  | N.A. |
| <b>Polyphenolic compounds</b> |                              |             |   |                      |                        |      |   |   |   |                    |  |      |
| 305                           | Gossypol                     | 303-45-7    | ↓ | <3<br>(24 h)         | n.d.                   | [92] | — |   |   | Low to<br>Moderate |  | N.A. |

S23

|                                |                          |             |   |                    |                     |            |   |   |   |   |              |      |
|--------------------------------|--------------------------|-------------|---|--------------------|---------------------|------------|---|---|---|---|--------------|------|
| 322                            | C8-Ceramide              | 74713-59-0  | ↓ | (0.5 h)<br>15      | (40 µM)<br>15       | [94]       |   |   |   |   |              |      |
| <b>Steroids</b>                |                          |             |   |                    |                     |            |   |   |   |   |              |      |
| 323                            | 17β-Estradiol            | 50-28-2     | ↓ | >250<br>(24 h)     | <i>n.d.</i>         | [10]       | — | — | E | E | Group<br>1 * | +    |
| 324                            | Fulvestrant              | 129453-61-8 | — | >250<br>(0.5-24 h) | >1440<br>(250 µM)   | [10]       |   |   |   |   |              | N.A. |
| 325                            | Testosterone             | 58-22-0     | — | >250<br>(0.5-24 h) | >1440<br>(1-250 µM) | [10]       | E |   |   |   |              | +    |
| <b>Trihydroxybenzoic acids</b> |                          |             |   |                    |                     |            |   |   |   |   |              |      |
| 326                            | Gallic acid              | 149-91-7    | ↓ | <100<br>(0.5, 1 h) | <i>n.d.</i>         | [25,76,78] |   |   |   |   |              | N.A. |
| <b>Triterpenoids</b>           |                          |             |   |                    |                     |            |   |   |   |   |              |      |
| 327                            | 18α-glycyrrhethinic acid | 1449-05-4   | ↓ | 65<br>(0.5 h)      | <i>n.d.</i>         | [9]        | ↓ |   |   |   |              | N.A. |
| 328                            | 18β-glycyrrhethinic acid | 471-53-4    | ↓ | <30<br>(0.3 h)     | <i>n.d.</i>         | [17]       | ↓ |   |   |   |              | N.A. |

**CASRN**, Chemical Abstracts Service Registry Number; **DDT**, dichlorodiphenyltrichloroethane; **EC<sub>50</sub>**, the concentration causing 50% GJIC inhibition; **EGF**, epidermal growth factor; **ET<sub>50</sub>**, the exposure time causing 50% GJIC inhibition; **GJIC**, gap junctional intercellular communication; **MBOCA**, 4,4'-methylene bis (2-chloroaniline); **MC**, metabolic cooperation; **NA**, not available; *n.d.*, not determined; *n.s.*, not specified; **PAHs**, polycyclic aromatic hydrocarbons; **PBBs**, polybrominated biphenyls; **PCBs**, polychlorinated biphenyls; **PCDDs**, polychlorinated dibenzo-p-dioxins; **PFASs**, perfluoroalkyl and polyfluoroalkyl substances; **Ref.**, reference; **TCDD**, tetrachlorodibenzo-p-dioxin; **THC**, delta-9-tetrahydrocannabinol; **TNFα**, tumor necrosis factor-alpha; **TRAP 6**, thrombin receptor activator peptide 6; **SL-DT**, scrape loading-dye transfer

\*(oestrogen-only menopausal therapy)

#### Legend:



**SL-DT assay**

|     |                                                                                                                           |
|-----|---------------------------------------------------------------------------------------------------------------------------|
| ↓   | Significant GJIC inhibition and the EC <sub>50</sub> value could be calculated                                            |
| ↓   | Significant GJIC inhibition, but less than 50% of a negative control (the EC <sub>50</sub> value could not be calculated) |
| —   | No GJIC inhibition                                                                                                        |
| —/↓ | More studies report no GJIC inhibition than significant GJIC inhibition                                                   |
| E   | Equivocal result (no GJIC inhibition:significant GJIC inhibition = 1:1)                                                   |

**Genotoxicity**

|   |                                                                                                                                               |
|---|-----------------------------------------------------------------------------------------------------------------------------------------------|
| + | Positive                                                                                                                                      |
| — | Negative                                                                                                                                      |
| E | Equivocal result, when response is weak or not reproduced between experiments or between laboratories                                         |
| I | Inconclusive or (more usually) inadequately tested (e.g. not tested both - and + S9, insufficient concentrations, insufficient toxicity etc.) |

**IARC**

|                 |                                                                                                                                       |
|-----------------|---------------------------------------------------------------------------------------------------------------------------------------|
| <b>Group 1</b>  | "Carcinogenic to humans" There is enough evidence to conclude that it can cause cancer in humans.                                     |
| <b>Group 2A</b> | "Probably carcinogenic to humans" There is strong evidence that it can cause cancer in humans, but at present it is not conclusive.   |
| <b>Group 2B</b> | "Possibly carcinogenic to humans" There is some evidence that it can cause cancer in humans but at present it is far from conclusive. |
| <b>Group 3</b>  | "Unclassifiable as to carcinogenicity in humans" There is no evidence at present that it causes cancer in humans.                     |

**CompTox/ToxRefDB**

|    |               |
|----|---------------|
| +  | Positive      |
| NA | Not available |

**MC assay**

|   |                              |
|---|------------------------------|
| ↓ | GJIC inhibition              |
| — | No GJIC inhibition           |
| E | Equivocal result / Uncertain |

**OncoLogic**

|                                        |                                                                               |
|----------------------------------------|-------------------------------------------------------------------------------|
| <b>Low</b>                             | Unlikely to be a carcinogen                                                   |
| <b>Marginal</b>                        | Likely to have equivocal carcinogenic activity                                |
| <b>Low-moderate</b>                    | Likely to be weakly carcinogenic                                              |
| <b>Moderate</b>                        | Likely to be moderately active carcinogen                                     |
| <b>High-moderate</b>                   | Highly likely to be a moderately active carcinogen                            |
| <b>High</b>                            | Highly likely to be a potent carcinogen                                       |
| <b>Low-moderate to Moderate</b>        | Likely to be weakly carcinogenic to Likely to be moderately active carcinogen |
| <b>Uncertain/Unknown</b>               | Uncertain                                                                     |
| <b>Marginal to High-moderate</b>       | Uncertain                                                                     |
| <b>Marginal to Low-moderate</b>        | Uncertain                                                                     |
| <b>Low to Moderate to Marginal</b>     | Uncertain                                                                     |
| <b>Low to Moderate (High-moderate)</b> | Uncertain                                                                     |

## Supplementary Figures

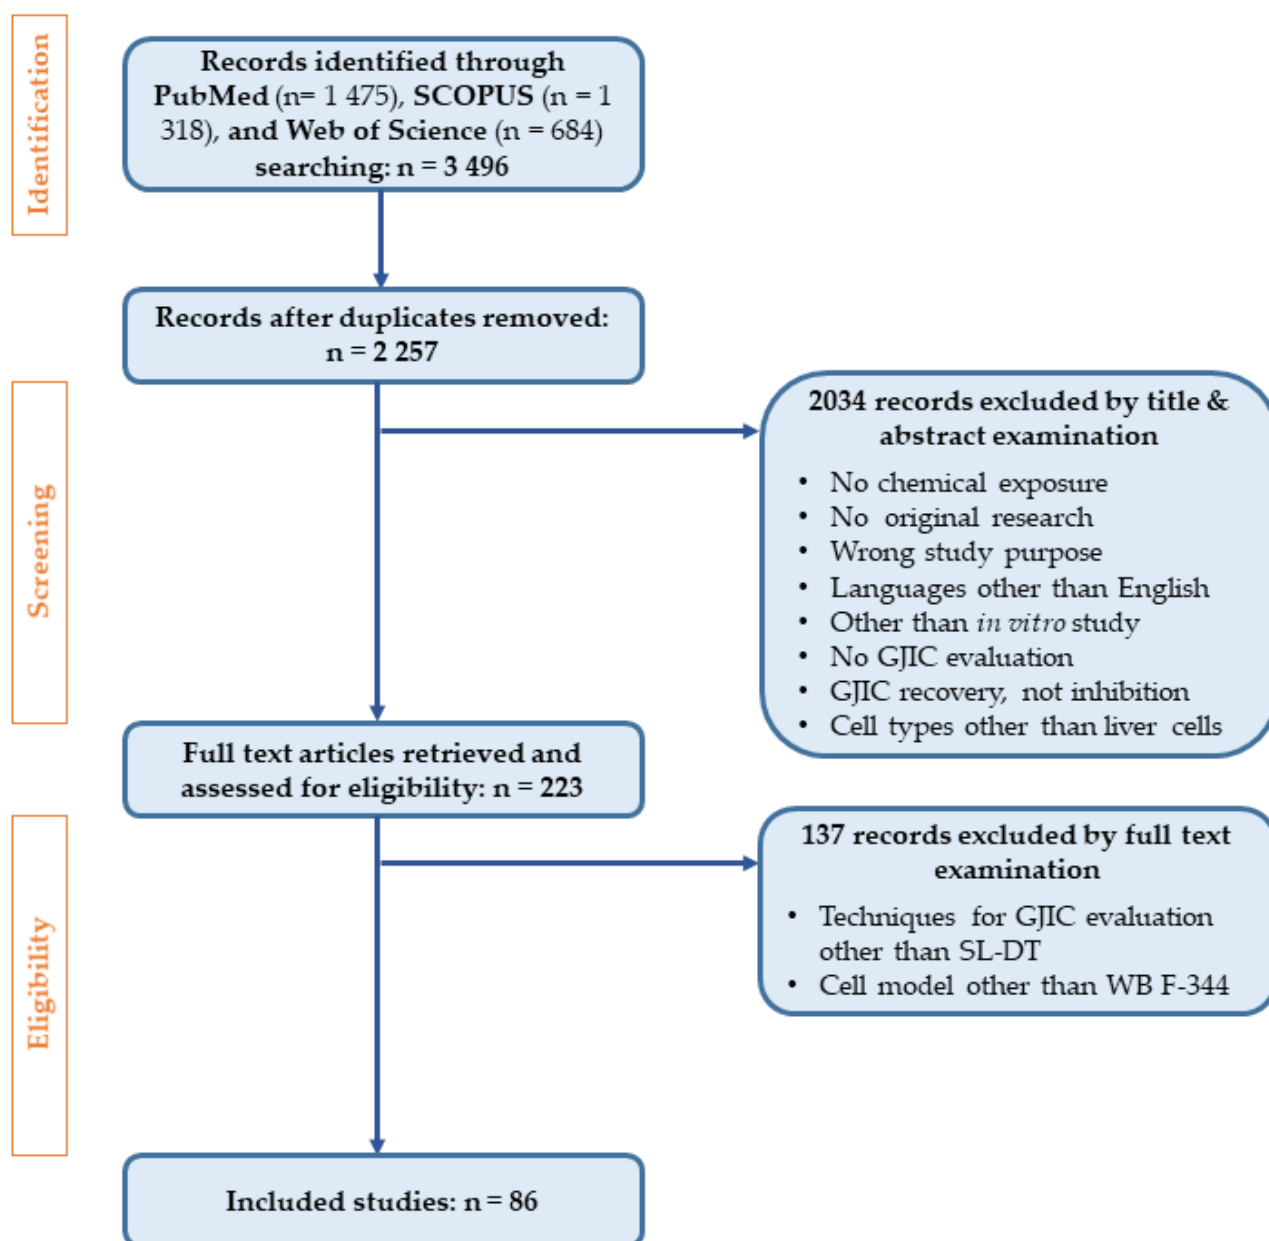

**Supplementary Figure S1.** A study flow for the systematic literature search and exclusion criteria.

## References

1. Sakai, A.; Iwase, Y.; Nakamura, Y.; Sasaki, K.; Tanaka, N.; Umeda, M. Use of a cell transformation assay with established cell lines, and a metabolic cooperation assay with V79 cells for the detection of tumour promoters: a review. *Altern. Lab. Anim.* **2002**, *30*, 33–59, doi:10.1177/026119290203000105.
2. Rosenkranz, M.; Rosenkranz, H.S.; Klopman, G. Intercellular communication, tumor promotion and non-genotoxic carcinogenesis: relationships based upon structural considerations. *Mutat. Res.* **1997**, *381*, 171–188, doi:10.1016/s0027-5107(97)00165-6.
3. Corvi, R.; Madia, F. EURL ECVAM genotoxicity and carcinogenicity consolidated database of Ames positive chemicals. *Eur. Comm. Jt. Res. Cent. [Dataset] PID* **2018**.
4. Madia, F.; Kirkland, D.; Morita, T.; White, P.; Asturiol, D.; Corvi, R. EURL ECVAM Genotoxicity and Carcinogenicity Database of Substances Eliciting Negative Results in the Ames Test: Construction of the Database. *Mutat. Res. Toxicol. Environ. Mutagen.* **2020**, *854–855*, 503199, doi:https://doi.org/10.1016/j.mrgentox.2020.503199.
5. Williams, A.J.; Grulke, C.M.; Edwards, J.; McEachran, A.D.; Mansouri, K.; Baker, N.C.; Patlewicz, G.; Shah, I.; Wambaugh, J.F.; Judson, R.S.; et al. The CompTox Chemistry Dashboard: a community data resource for environmental chemistry. *J. Cheminform.* **2017**, *9*, 61, doi:10.1186/s13321-017-0247-6.
6. US EPA Oncologic 9/8 Available online: <https://www.epa.gov/tsca-screening-tools/oncologictm-expert-system-evaluate-carcinogenic-potential-chemicals>.
7. IARC No Title Available online: <https://monographs.iarc.fr/list-of-classifications> (accessed on Oct 10, 2020).
8. Watford, S.; Ly Pham, L.; Wignall, J.; Shin, R.; Martin, M.T.; Friedman, K.P. ToxRefDB version 2.0: Improved utility for predictive and retrospective toxicology analyses. *Reprod. Toxicol.* **2019**, *89*, 145–158, doi:https://doi.org/10.1016/j.reprotox.2019.07.012.
9. Pulukuri, S.; Sitaramayya, A. Retinaldehyde, a potent inhibitor of gap junctional intercellular communication. *Cell Commun. Adhes.* **2004**, *11*, 25–33, doi:10.1080/15419060490471784.
10. Babica, P.; Zurabian, R.; Kumar, E.R.; Chopra, R.; Mianeki, M.J.; Park, J.-S.; Jasa, L.; Trosko, J.E.; Upham, B.L. Methoxychlor and Vinclozolin Induce Rapid Changes in Intercellular and Intracellular Signaling in Liver Progenitor Cells. *Toxicol. Sci.* **2016**, *153*, 174–185, doi:10.1093/toxsci/kfw114.
11. Kuslikis, B.I.; Trosko, J.E.; Braselton, W.E.J. Mutagenicity and effect on gap-junctional intercellular communication of 4,4'-methylenebis(2-chloroaniline) and its oxidized metabolites. *Mutagenesis* **1991**, *6*, 19–24, doi:10.1093/mutage/6.1.19.
12. Kang, N.J.; Lee, K.M.; Kim, J.H.; Lee, B.K.; Kwon, J.Y.; Lee, K.W.; Lee, H.J. Inhibition of gap junctional intercellular communication by the green tea polyphenol (-)-epigallocatechin gallate in normal rat liver epithelial cells. *J. Agric. Food Chem.* **2008**, *56*, 10422–10427, doi:10.1021/jf801981w.
13. Upham, B.L.; Rummel, A.M.; Carbone, J.M.; Trosko, J.E.; Ouyang, Y.; Crawford, R.B.; Kaminski, N.E. Cannabinoids inhibit gap junctional intercellular communication and activate ERK in a rat liver epithelial cell line. *Int. J. cancer* **2003**, *104*, 12–18, doi:10.1002/ijc.10899.
14. Upham, B.L.; Boddy, B.; Xing, X.S.; Trosko, J.E.; Masten, S.J. Non-genotoxic effects of selected pesticides and their disinfection by-products on gap junctional intercellular communication. *OZONE-SCIENCE Eng.* **1997**, *19*, 351–369, doi:10.1080/01919519708547298.
15. Kang, K.S.; Kang, B.C.; Lee, B.J.; Che, J.H.; Li, G.X.; Trosko, J.E.; Lee, Y.S. Preventive effect of epicatechin and ginsenoside Rb(2) on the inhibition of gap junctional intercellular communication by TPA and H(2)O(2). *Cancer Lett.* **2000**, *152*, 97–106, doi:10.1016/s0304-3835(99)00438-3.
16. Abdelmohsen, K.; Stuhlmann, D.; Daubrawa, F.; Klotz, L.-O.L.-O.L.-O. Dicumarol is a potent reversible inhibitor of gap junctional intercellular communication. *Arch. Biochem. Biophys.* **2005**, *434*, 241–247, doi:10.1016/j.abb.2004.11.002.

17. Sovadinova, I.; Babica, P.; Boke, H.; Kumar, E.; Wilke, A.; Park, J.-S.; Trosko, J.E.; Upham, B.L.; Raza, F.A.; Rehman, S.U.; et al. Phosphatidylcholine Specific PLC-Induced Dysregulation of Gap Junctions, a Robust Cellular Response to Environmental Toxicants, and Prevention by Resveratrol in a Rat Liver Cell Model. *PLoS One* **2015**, *10*, e0124454, doi:10.1371/journal.pone.0137599.
18. Fransson, R.; Nicotera, P.; Wärngård, L.; Ahlborg, U.G. Changes in cytosolic  $Ca^{2+}$  are not involved in DDT-induced loss of gap junctional communication in WB-F344 cells. *Cell Biol. Toxicol.* **1990**, *6*, 235–244, doi:10.1007/BF00249596.
19. Hii, C.S.; Ferrante, A.; Schmidt, S.; Rathjen, D.A.; Robinson, B.S.; Poulos, A.; Murray, A.W. Inhibition of gap junctional communication by polyunsaturated fatty acids in WB cells: evidence that connexin 43 is not hyperphosphorylated. *Carcinogenesis* **1995**, *16*, 1505–1511, doi:10.1093/carcin/16.7.1505.
20. Lee, K.M.; Kwon, J.Y.; Lee, K.W.; Lee, H.J. Ascorbic acid 6-palmitate suppresses gap-junctional intercellular communication through phosphorylation of connexin 43 via activation of the MEK-ERK pathway. *Mutat. Res. Mol. Mech. Mutagen.* **2009**, *660*, 51–56, doi:10.1016/j.mrfmmm.2008.10.012.
21. Upham, B.L.; Deocampo, N.D.; Wurl, B.; Trosko, J.E. Inhibition of gap junctional intercellular communication by perfluorinated fatty acids is dependent on the chain length of the fluorinated tail. *Int. J. Cancer* **1998**, *78*, 491–495, doi:10.1002/(SICI)1097-0215(19981109)78:4<491::AID-IJC16>3.0.CO;2-9.
22. Hakulinen, P.; Rintala, E.; Mäki-Paakkanen, J.; Komulainen, H. Altered expression of connexin43 in the inhibition of gap junctional intercellular communication by chlorohydroxyfuranones in WB-F344 rat liver epithelial cells. *Toxicol. Appl. Pharmacol.* **2006**, *212*, 146–155, doi:10.1016/j.taap.2005.07.013.
23. Flodström, S.; Wärngård, L.; Hemming, H.; Ahlborg, U.G. Chlorobenzilate-induced effects on enzyme-altered foci in rat liver and intercellular communication in rat liver WB-F344 epithelial cells. *Cancer Lett.* **1988**, *43*, 161–166, doi:10.1016/0304-3835(88)90165-6.
24. Sai, K.; Upham, B.L.; Kang, K.S.; Hasegawa, R.; Inoue, T.; Trosko, J.E. Inhibitory effect of pentachlorophenol on gap junctional intercellular communication in rat liver epithelial cells in vitro. *Cancer Lett.* **1998**, *130*, 9–17, doi:10.1016/s0304-3835(98)00082-2.
25. Kim, J.H.; Kang, N.J.; Lee, B.K.; Lee, K.W.; Lee, H.J. Gallic acid, a metabolite of the antioxidant propyl gallate, inhibits gap junctional intercellular communication via phosphorylation of connexin 43 and extracellular-signal-regulated kinase1/2 in rat liver epithelial cells. *Mutat. Res.* **2008**, *638*, 175–183, doi:10.1016/j.mrfmmm.2007.10.005.
26. Forejtníková, H.; Lunerová, K.; Kubínová, R.; Jankovská, D.; Marek, R.; Kares, R.; Suchý, V.; Vondráček, J.; Machala, M. Chemoprotective and toxic potentials of synthetic and natural chalcones and dihydrochalcones in vitro. *Toxicology* **2005**, *208*, 81–93, doi:10.1016/j.tox.2004.11.011.
27. Nishikawa, A.; Sai, K.; Okazaki, K.; Son, H.-Y.; Kanki, K.; Nakajima, M.; Kinae, N.; Nohmi, T.; Trosko, J.E.; Inoue, T.; et al. MX, a by-product of water chlorination, lacks in vivo genotoxicity in gpt delta mice but inhibits gap junctional intercellular communication in rat WB cells. *Environ. Mol. Mutagen.* **2006**, *47*, 48–55, doi:10.1002/em.20167.
28. Hsiao, P.-J.; Jao, J.-C.; Tsai, J.-L.; Chang, W.-T.; Jeng, K.-S.; Kuo, K.-K. Inorganic arsenic trioxide induces gap junction loss in association with the downregulation of connexin43 and E-cadherin in rat hepatic “stem-like” cells. *Kaohsiung J. Med. Sci.* **2014**, *30*, 57–67, doi:10.1016/j.kjms.2013.10.002.
29. Hill, C.S.; Oh, S.Y.; Schmidt, S.A.; Clark, K.J.; Murray, A.W. Lysophosphatidic acid inhibits gap-junctional communication and stimulates phosphorylation of connexin-43 in WB cells: possible involvement of the mitogen-activated protein kinase cascade. *Biochem. J.* **1994**, *303* ( Pt 2), 475–479, doi:10.1042/bj3030475.
30. Jeong, S.H.; Cho, M.H.; Cho, J.H.; Jeon, S.H.; Cho, M.H.; Cho, J.H.; Jeong, S.H.; Cho, M.H.; Cho, J.H.; Jeon, S.H.; et al. Effects of cadmium on gap junctional intercellular communication in WB-F344 rat liver epithelial cells. *Hum. Exp. Toxicol.* **2001**, *20*, 577–583, doi:10.1191/096032701718620855.
31. Masten, S.J.; Tian, M.; Upham, B.L.; Trosko, J.E. Effect of selected pesticides and their ozonation by-products on gap junctional intercellular communication using rat liver epithelial cell lines. *Chemosphere* **2001**, *44*, 457–465, doi:10.1016/s0045-6535(00)00296-4.

32. Alpatova, A.L.; Shan, W.; Babica, P.; Upham, B.L.; Rogensues, A.R.; Masten, S.J.; Drown, E.; Mohanty, A.K.; Alocilja, E.C.; Tarabara, V. V Single-walled carbon nanotubes dispersed in aqueous media via non-covalent functionalization: effect of dispersant on the stability, cytotoxicity, and epigenetic toxicity of nanotube suspensions. *Water Res.* **2010**, *44*, 505–520, doi:10.1016/j.watres.2009.09.042.
33. Upham, B.L.; Guzvić, M.; Scott, J.; Carbone, J.M.; Blaha, L.; Coe, C.; Li, L.L.; Rummel, A.M.; Trosko, J.E. Inhibition of gap junctional intercellular communication and activation of mitogen-activated protein kinase by tumor-promoting organic peroxides and protection by resveratrol. *Nutr. Cancer* **2007**, *57*, 38–47, doi:10.1080/01635580701268188.
34. Flodström, S.; Hemming, H.; Wärngård, L.; Ahlborg, U.G. Promotion of altered hepatic foci development in rat liver, cytochrome P450 enzyme induction and inhibition of cell-cell communication by DDT and some structurally related organohalogen pesticides. *Carcinogenesis* **1990**, *11*, 1413–1417, doi:10.1093/carcin/11.8.1413.
35. Babica, P.; Čtveráčková, L.; Lenčesová, Z.; Trosko, J.E.; Upham, B.L. Chemopreventive Agents Attenuate Rapid Inhibition of Gap Junctional Intercellular Communication Induced by Environmental Toxicants. *Nutr. Cancer* **2016**, *68*, 827–837, doi:10.1080/01635581.2016.1180409.
36. Nielsen, M.; Ruch, R.J.; Vang, O. Resveratrol reverses tumor-promoter-induced inhibition of gap-junctional intercellular communication. *Biochem. Biophys. Res. Commun.* **2000**, *275*, 804–809, doi:10.1006/bbrc.2000.3378.
37. Matesic, D.F.; Abifadel, D.N.; Garcia, E.L.; Jann, M.W. Effect of thioridazine on gap junction intercellular communication in connexin 43-expressing cells. *Cell Biol. Toxicol.* **2006**, *22*, 257–268, doi:10.1007/s10565-006-0047-7.
38. Horvath, A.; Upham, B.L.; Ganey, V.; Trosko, J.E. Determination of the epigenetic effects of ochratoxin in a human kidney and a rat liver epithelial cell line. *Toxicol.* **2002**, *40*, 273–282, doi:10.1016/s0041-0101(01)00219-7.
39. Lee, C.-H.; Chen, I.-H.; Lee, C.-R.; Chi, C.-H.; Tsai, M.-C.; Tsai, J.-L.; Lin, H.-F. Inhibition of gap junctional Intercellular communication in WB-F344 rat liver epithelial cells by triphenyltin chloride through MAPK and PI3-kinase pathways. *J. Occup. Med. Toxicol.* **2010**, *5*, 17, doi:10.1186/1745-6673-5-17.
40. Sharov, V.S.; Briviba, K.; Sies, H. Peroxynitrite diminishes gap junctional communication: protection by selenite supplementation. *IUBMB Life* **1999**, *48*, 379–384, doi:10.1080/713803538.
41. Lee, B.K.; Chung, M.-Y.; Lee, K.W. Benzo[a]pyrene-7,8-diol-9,10-epoxide inhibits gap junction intercellular communication via phosphorylation of tumor progression locus 2 in WB-F344 rat liver epithelial cells. *Mol. Carcinog.* **2015**, *54*, 351–358, doi:10.1002/mc.22103.
42. Upham, B.L.; Weis, L.M.; Rummel, A.M.; Masten, S.J.; Trosko, J.E. The effects of anthracene and methylated anthracenes on gap junctional intercellular communication in rat liver epithelial cells. *Fundam. Appl. Toxicol.* **1996**, *34*, 260–264, doi:10.1006/faat.1996.0195.
43. Upham, B.L.; Weis, L.M.; Trosko, J.E. Modulated gap junctional intercellular communication as a biomarker of PAH epigenetic toxicity: structure-function relationship. *Environ. Health Perspect.* **1998**, *106 Suppl*, 975–981, doi:10.1289/ehp.98106s4975.
44. Upham, B.L.; Blaha, L.; Babica, P.; Park, J.-S.; Sovadinova, I.; Pudrith, C.; Rummel, A.M.; Weis, L.M.; Sai, K.; Tithof, P.K.; et al. Tumor promoting properties of a cigarette smoke prevalent polycyclic aromatic hydrocarbon as indicated by the inhibition of gap junctional intercellular communication via phosphatidylcholine-specific phospholipase C. *Cancer Sci.* **2008**, *99*, 696–705, doi:10.1111/j.1349-7006.2008.00752.x.
45. Weis, L.M.; Rummel, A.M.; Masten, S.J.; Trosko, J.E.; Upham, B.L. Bay or baylike regions of polycyclic aromatic hydrocarbons were potent inhibitors of gap junctional intercellular communication. *Environ. Health Perspect.* **1998**, *106*, 17–22, doi:10.1289/ehp.9810617.
46. Rummel, A.M.; Trosko, J.E.; Wilson, M.R.; Upham, B.L. Polycyclic aromatic hydrocarbons with bay-like regions inhibited gap junctional intercellular communication and stimulated MAPK activity. *Toxicol. Sci.* **1999**, *49*, 232–240, doi:10.1093/toxsci/49.2.232.
47. Bláha, L.; Kapplová, P.; Vondráček, J.; Upham, B.; Machala, M.; Vondráček, J.; Upham, B.; Machala, M.; Vondráček,

J.; Upham, B.; et al. Inhibition of gap-junctional intercellular communication by environmentally occurring polycyclic aromatic hydrocarbons. *Toxicol. Sci.* **2002**, *65*, 43–51, doi:10.1093/toxsci/65.1.43.

48. Marvanová, S.; Vondráček, J.; Pencíková, K.; Trilecová, L.; Krcmář, P.; Topinka, J.; Nováková, Z.; Milcová, A.; Machala, M. Toxic effects of methylated benz[a]anthracenes in liver cells. *Chem. Res. Toxicol.* **2008**, *21*, 503–512, doi:10.1021/tx700305x.

49. Upham, B.L.; Masten, S.J.; Lockwood, B.R.; Trosko, J.E. Nongenotoxic effects of polycyclic aromatic hydrocarbons and their oxygenation by-products on the intercellular communication of rat liver epithelial cells. *Fundam. Appl. Toxicol.* **1994**, *23*, 470–475, doi:10.1006/faat.1994.1129.

50. Švihálková-Sindlerová, L.; Machala, M.; Pencíková, K.; Marvanová, S.; Neca, J.; Topinka, J.; Sevastyanova, O.; Kozubík, A.; Vondráček, J.; Švihálková-Sindlerová, L.; et al. Dibenzoanthracenes and benzo[a]chrysenes elicit both genotoxic and nongenotoxic events in rat liver “stem-like” cells. *Toxicology* **2007**, *232*, 147–159, doi:10.1016/j.tox.2006.12.024.

51. Kabátková, M.; Svobodová, J.; Pěňčíková, K.; Mohatad, D.S.; Šmerdová, L.; Kozubík, A.; Machala, M.; Vondráček, J.; Kabatkova, M.; Svobodova, J.; et al. Interactive effects of inflammatory cytokine and abundant low-molecular-weight PAHs on inhibition of gap junctional intercellular communication, disruption of cell proliferation control, and the AhR-dependent transcription. *Toxicol. Lett.* **2015**, *232*, 113–121, doi:10.1016/j.toxlet.2014.09.023.

52. Novakova, K.; Blaha, L.; Babica, P. Tumor promoting effects of cyanobacterial extracts are potentiated by anthropogenic contaminants - Evidence from in vitro study. *Chemosphere* **2012**, *89*, 30–37, doi:10.1016/j.chemosphere.2012.04.008.

53. Luster-Teasley, S.L.; Ganey, P.E.; DiOrio, M.; Ward, J.S. 3rd; Maleczka, R.E.J.; Trosko, J.E.; Masten, S.J. Effect of byproducts from the ozonation of pyrene: biphenyl-2,2',6,6'-tetracarbaldehyde and biphenyl-2,2',6,6'-tetracarboxylic acid on gap junction intercellular communication and neutrophil function. *Environ. Toxicol. Chem.* **2005**, *24*, 733–740, doi:10.1897/04-679.1.

54. Herner, H.A.; Trosko, J.E.; Masten, S.J. The epigenetic toxicity of pyrene and related ozonation byproducts containing an aldehyde functional group. *Environ. Sci. Technol.* **2001**, *35*, 3576–3583, doi:10.1021/es0106117.

55. Machala, M.; Švihálková-Sindlerová, L.; Pencíková, K.; Krcmář, P.; Topinka, J.; Milcová, A.; Nováková, Z.; Kozubík, A.; Vondráček, J. Effects of methylated chrysenes on AhR-dependent and -independent toxic events in rat liver epithelial cells. *Toxicology* **2008**, *247*, 93–101, doi:10.1016/j.tox.2008.02.008.

56. Vondráček, J.; Chramostová, K.; Plísková, M.; Bláha, L.; Brack, W.; Kozubík, A.; Machala, M.; Vondracek, J.; Chramostova, K.; Pliskova, M.; et al. Induction of aryl hydrocarbon receptor-mediated and estrogen receptor-mediated activities, and modulation of cell proliferation by dinaphthofurans. *Environ. Toxicol. Chem.* **2004**, *23*, 2214–2220, doi:10.1897/03-620.

57. Vondráček, J.; Švihálková-Sindlerová, L.; Pěňčíková, K.; Krčmář, P.; Andrysík, Z.; Chramostová, K.; Marvanová, S.; Valovičová, Z.; Kozubík, A.; Gábelová, A.; et al. 7H-Dibenzo[c,g]carbazole and 5,9-dimethyldibenzo[c,g]carbazole exert multiple toxic events contributing to tumor promotion in rat liver epithelial “stem-like” cells. *Mutat. Res. - Fundam. Mol. Mech. Mutagen.* **2006**, *596*, 43–56, doi:10.1016/j.mrfmmm.2005.11.005.

58. Evans, M.G.; Trosko, J.E. Concentration/response effect of 2,2', 4,4', 5,5'-hexabromobiphenyl on cell-cell communication in vitro: assessment by fluorescence redistribution after photobleaching (“FRAP”). *Cell Biol. Toxicol.* **1988**, *4*, 163–171, doi:10.1007/BF00119243.

59. Machala, M.; Bláha, L.; Vondráček, J.; Trosko, J.E.; Scott, J.; Upham, B.L. Inhibition of gap junctional intercellular communication by noncoplanar polychlorinated biphenyls: Inhibitory potencies and screening for potential mode(s) of action. *Toxicol. Sci.* **2003**, *76*, 102–111, doi:10.1093/toxsci/kfg209.

60. Hamers, T.; Kamstra, J.H.; Cuijij, P.H.; Pencikova, K.; Palkova, L.; Simeckova, P.; Vondracek, J.; Andersson, P.L.; Stenberg, M.; Machala, M. In Vitro Toxicity Profiling of Ultrapure Non-Dioxin-like Polychlorinated Biphenyl Congeners and Their Relative Toxic Contribution to PCB Mixtures in Humans. *Toxicol. Sci.* **2011**, *121*, 88–100, doi:10.1093/toxsci/kfr043.

61. Simecková, P.; Vondráček, J.; Andrysík, Z.; Zatloukalová, J.; Krcmář, P.; Kozubík, A.; Machala, M. The 2,2',4,4',5,5'-

hexachlorobiphenyl-enhanced degradation of connexin 43 involves both proteasomal and lysosomal activities. *Toxicol. Sci.* **2009**, *107*, 9–18, doi:10.1093/toxsci/kfn202.

62. Machala, M.; Bláha, L.; Lehmler, H.-J.; Plisková, M.; Májková, Z.; Kapplová, P.; Sovadinová, I.; Vondráček, J.; Malmberg, T.; Robertson, L.W. Toxicity of hydroxylated and quinoid PCB metabolites: inhibition of gap junctional intercellular communication and activation of aryl hydrocarbon and estrogen receptors in hepatic and mammary cells. *Chem. Res. Toxicol.* **2004**, *17*, 340–347, doi:10.1021/tx030034v.

63. Satoh, A.Y.; Trosko, J.E.; Masten, S.J. Epigenetic toxicity of hydroxylated biphenyls and hydroxylated polychlorinated biphenyls on normal rat liver epithelial cells. *Environ. Sci. Technol.* **2003**, *37*, 2727–2733, doi:10.1021/es021041t.

64. Andrysik, Z.; Prochazkova, J.; Kabatkova, M.; Umannova, L.; Simeckova, P.; Kohoutek, J.J.J.J.J.; Kozubik, A.; Machala, M.; Vondracek, J.; Andrysik, Z.; et al. Aryl hydrocarbon receptor-mediated disruption of contact inhibition is associated with connexin43 downregulation and inhibition of gap junctional intercellular communication. *Arch. Toxicol.* **2013**, *87*, 491–503, doi:10.1007/s00204-012-0963-7.

65. Upham, B.L.; Trosko, J.E. A paradigm shift in the understanding of oxidative stress and its implications to exposure of low-level ionizing radiation. *Acta Med. Nagasaki.* **2005**, *50*, 63–68.

66. Oh, S.-Y.Y.; Schmidt, S.A.; Murray, A.W. Epidermal growth factor inhibits Gap junctional communication and stimulates serine-phosphorylation of connexin43 in WB cells by a protein kinase c-independent mechanism. *Cell Commun. Adhes.* **1993**, *1*, 143–149, doi:10.3109/15419069309095690.

67. Upham, B.L.; Kang, K.S.; Cho, H.Y.; Trosko, J.E. Hydrogen peroxide inhibits gap junctional intercellular communication in glutathione sufficient but not glutathione deficient cells. *Carcinogenesis* **1997**, *18*, 37–42, doi:10.1093/carcin/18.1.37.

68. Hasler, C.M.; Frick, M.A.; Bennink, M.R.; Trosko, J.E. TPA-induced inhibition of gap junctional intercellular communication is not mediated through free radicals. *Toxicol. Appl. Pharmacol.* **1990**, *103*, 389–398, doi:10.1016/0041-008x(90)90312-i.

69. Kim, Y.-J.; Seo, S.G.; Choi, K.; Kim, J.E.; Kang, H.; Chung, M.-Y.; Lee, K.W.; Lee, H.J. Recovery Effect of Onion Peel Extract against H<sub>2</sub>O<sub>2</sub>-Induced Inhibition of Gap-Junctional Intercellular Communication is Mediated through Quercetin. *J. Food Sci.* **2014**, *79*, H1011–H1017, doi:10.1111/1750-3841.12440.

70. Kim, J.-S.; Ha, T.-Y.; Ahn, J.; Kim, H.-K.; Kim, S. Pterostilbene from *Vitis coignetiae* protect H<sub>2</sub>O<sub>2</sub>-induced inhibition of gap junctional intercellular communication in rat liver cell line. *Food Chem. Toxicol. an Int. J. Publ. Br. Ind. Biol. Res. Assoc.* **2009**, *47*, 404–409, doi:10.1016/j.fct.2008.11.038.

71. Lee, S.J.; Lee, K.W.; Lee, H.J. Abies nephrolepis leaf phenolics prevent the inhibition of gap junction intercellular communication by hydrogen peroxide in rat liver epithelial cells. *Biofactors* **2004**, *21*, 357–360, doi:10.1002/biof.552210168.

72. Hwang, J.-W.; Park, J.-S.; Jo, E.-H.; Kim, S.-J.; Yoon, B.-S.; Kim, S.-H.; Lee, Y.-S.; Kang, K.-S. Chinese cabbage extracts and sulforaphane can protect H<sub>2</sub>O<sub>2</sub>-induced inhibition of gap junctional intercellular communication through the inactivation of ERK1/2 and p38 MAP kinases. *J. Agric. Food Chem.* **2005**, *53*, 8205–8210, doi:10.1021/jf051747h.

73. Hwang, J.-W.; Jung, J.-W.; Lee, Y.-S.; Kang, K.-S. Indole-3-Carbinol Prevents H<sub>2</sub>O<sub>2</sub>-Induced Inhibition of Gap Junctional Intercellular Communication by Inactivation of PKB/Akt. *J. Vet. Med. Sci.* **2008**, *70*, 1057–1063, doi:10.1292/jvms.70.1057.

74. Kim, J.H.; Choi, S.H.; Kim, J.; Lee, B.K.; Lee, K.W.; Lee, H.J. Differential regulation of the hydrogen-peroxide-induced inhibition of gap-junction intercellular communication by resveratrol and butylated hydroxyanisole. *Mutat. Res.* **2009**, *671*, 40–44, doi:10.1016/j.mrfmmm.2009.08.011.

75. Lee, D.E.; Shin, B.J.; Hur, H.J.; Kim, J.H.; Kim, J.; Kang, N.J.; Kim, D.O.; Lee, C.Y.; Lee, K.W.; Lee, H.J. Quercetin, the active phenolic component in kiwifruit, prevents hydrogen peroxide-induced inhibition of gap-junction intercellular communication. *Br. J. Nutr.* **2010**, *104*, 164–170, doi:10.1017/S0007114510000346.

76. Kim, J.H.; Lee, B.K.; Lee, K.W.; Lee, H.J. Resveratrol counteracts gallic acid-induced down-regulation of gap-junction intercellular communication. *J. Nutr. Biochem.* **2009**, *20*, 149–154, doi:10.1016/j.jnutbio.2008.01.008.
77. Jung, J.-W.; Cho, S.-D.; Ahn, N.-S.; Yang, S.-R.; Park, J.-S.; Jo, E.-H.; Hwang, J.-W.; Aruoma, O.I.; Lee, Y.-S.; Kang, K.-S. Effects of the histone deacetylases inhibitors sodium butyrate and trichostatin A on the inhibition of gap junctional intercellular communication by H<sub>2</sub>O<sub>2</sub>- and 12-O-tetradecanoylphorbol-13-acetate in rat liver epithelial cells. *Cancer Lett.* **2006**, *241*, 301–308, doi:10.1016/j.canlet.2005.10.029.
78. Lee, K.W.; Hur, H.J.; Lee, H.J.; Lee, C.Y.; Ki, W.L.; Haeng, J.H.; Hyong, J.L.; Chang, Y.L.; Lee, K.W.; Hur, H.J.; et al. Antiproliferative effects of dietary phenolic substances and hydrogen peroxide. *J. Agric. Food Chem.* **2005**, *53*, 1990–1995, doi:10.1021/jf0486040.
79. Ki, W.L.; Hwang, E.-S.E.-S.; Nam, J.K.; Kyoung, H.K.; Hyong, J.L.; Lee, K.W.; Hwang, E.-S.E.-S.; Kang, N.J.; Kim, K.H.; Lee, H.J.; et al. Extraction and chromatographic separation of anticarcinogenic fractions from cacao bean husk. *BioFactors* **2005**, *23*, 141–150, doi:10.1002/biof.5520230303.
80. Kim, J.-S.; Lee, W.-M.; Rhee, H.C.; Kim, S. Red paprika (*Capsicum annuum* L.) and its main carotenoids, capsanthin and  $\beta$ -carotene, prevent hydrogen peroxide-induced inhibition of gap-junction intercellular communication. *Chem. Biol. Interact.* **2016**, *254*, 146–155, doi:10.1016/j.cbi.2016.05.004.
81. Cho, J.-H.; Cho, S.-D.; Hu, H.; Kim, S.-H.; Lee, S.K.; Lee, Y.-S.; Kang, K.-S. The roles of ERK1/2 and p38 MAP kinases in the preventive mechanisms of mushroom *Phellinus linteus* against the inhibition of gap junctional intercellular communication by hydrogen peroxide. *Carcinogenesis* **2002**, *23*, 1163–1169, doi:10.1093/carcin/23.7.1163.
82. Hu, W.; Jones, P.D.; Upham, B.L.; Trosko, J.E.; Lau, C.; Giesy, J.P. Inhibition of gap junctional intercellular communication by perfluorinated compounds in rat liver and dolphin kidney epithelial cell lines in vitro and Sprague-Dawley rats in vivo. *Toxicol. Sci.* **2002**, *68*, 429–436, doi:10.1093/toxsci/68.2.429.
83. Upham, B.L.; Park, J.-S.; Babica, P.; Sovadinova, I.; Rummel, A.M.; Trosko, J.E.; Hirose, A.; Hasegawa, R.; Kanno, J.; Sai, K. Structure-activity-dependent regulation of cell communication by perfluorinated fatty acids using in vivo and in vitro model systems. *Environ. Health Perspect.* **2009**, *117*, 545–551, doi:10.1289/ehp.11728.
84. Madhukar, B. V.; de Feijter-Rupp, H.L.; Trosko, J.E. Pulse treatment with the tumor promoter TPA delays the onset of desensitization response and prolongs the inhibitory effect on gap junctional intercellular communication of a rat liver epithelial cell line WB F-344. *Cancer Lett.* **1996**, *106*, 117–123, doi:10.1016/0304-3835(96)04315-7.
85. Sun, H.; Liu, G.-T. Chemopreventive effect of bicyclol on malignant transformation of WB-F344 rat liver epithelial cells and its effect on related signal transduction in vitro. *Cancer Lett.* **2006**, *236*, 239–249, doi:10.1016/j.canlet.2005.05.019.
86. Kang, K.S.; Yun, J.W.; Yoon, B.; Lim, Y.K.; Lee, Y.S. Preventive effect of germanium dioxide on the inhibition of gap junctional intercellular communication by TPA. *Cancer Lett.* **2001**, *166*, 147–153, doi:10.1016/s0304-3835(01)00446-3.
87. Sun, H.; Liu, G. Chemopreventive effect of dimethyl dicarboxylate biphenyl on malignant transformation of WB-F344 rat liver epithelial cells. *Acta Pharmacol. Sin.* **2005**, *26*, 1339–1344, doi:10.1111/j.1745-7254.2005.00208.x.
88. Oh, S.Y.; Madhukar, B. V.; Trosko, J.E. Inhibition of gap junctional blockage by palmitoyl carnitine and TMB-8 in a rat liver epithelial cell line. *Carcinogenesis* **1988**, *9*, 135–139, doi:10.1093/carcin/9.1.135.
89. Park, J.-R.; Park, J.-S.; Jo, E.-H.; Hwang, J.-W.; Kim, S.-J.; Ra, J.-C.; Aruoma, O.I.; Lee, Y.-S.; Kang, K.-S. Reversal of the TPA-induced inhibition of gap junctional intercellular communication by Chaga mushroom (*Inonotus obliquus*) extracts: effects on MAP kinases. *Biofactors* **2006**, *27*, 147–155, doi:10.1002/biof.5520270113.
90. Prochazka, L.; Turanek, J.; Tesarik, R.; Knotigova, P.; Polaskova, P.; Andrysik, Z.; Kozubik, A.; Zak, F.; Sova, P.; Neuzil, J.; et al. Apoptosis and inhibition of gap-junctional intercellular communication induced by LA-12, a novel hydrophobic platinum(IV) complex. *Arch. Biochem. Biophys.* **2007**, *462*, 54–61, doi:10.1016/j.abb.2007.03.021.
91. Čtveráková, L.; Jančula, D.; Raška, J.; Babica, P.; Sovadinová, I. Structure-Dependent Effects of Phthalates on Intercellular and Intracellular Communication in Liver Oval Cells. *Int. J. Mol. Sci.* **2020**, *21*, doi:10.3390/ijms21176069.
92. Ye, Y.-X.; Bombick, D.; Hirst, K.; Zhang, G.; Chang, C.-C.; Trosko, J.E.; Akera, T. The modulation of gap junctional



communication by Gossypol in various mammalian cell lines in vitro. *Toxicol. Sci.* **1990**, *14*, 817–832, doi:10.1093/toxsci/14.4.817.

93. Suzuki, J.; Na, H.K.; Upham, B.L.; Chang, C.C.; Trosko, J.E. lambda-Carrageenan-induced inhibition of gap-junctional intercellular communication in rat liver epithelial cells. *Nutr. CANCER-AN Int. J.* **2000**, *36*, 122–128, doi:10.1207/S15327914NC3601\_16.

94. Upham, B.L.; Koski, T.R.; Rummel, A.M.; Wilson, M.R.; Horvath, A.; Trosko, J.E. Differential roles of 2, 6, and 8 carbon ceramides on the modulation of gap junctional communication and apoptosis during carcinogenesis. *Cancer Lett.* **2003**, *191*, 27–34, doi:10.1016/s0304-3835(02)00620-1.
